# Supplementary material for: The Story of Elaeagia Resin (Mopa-Mopa), So Far
Source: MDPI journal article supplement (doi:10.3390/heritage6050229), 2023-05-12
Supplement: s1 [file s1]

# La historia de la resina de *Elaeagia* (mopa-mopa), hasta la fecha

Richard Newman<sup>1\*</sup> and Emily Kaplan<sup>2</sup> y Maria Cecilia Álvarez-White<sup>3</sup>

<sup>1</sup> Laboratorio de Investigación Científica, Museo de Bellas Artes, Boston, Massachusetts EE.UU.

<sup>2</sup> Centro de Recursos Culturales, Museo Nacional Smithsonian de los Indios Americanos, Suitland, Maryland EE.UU.

<sup>3</sup> Conservadora privada, Bogotá, Colombia

\* Correspondencia: [rnewman@mfa.org](mailto:rnewman@mfa.org).

**Resumen:** La inusual resina de algunas especies de *Elaeagia*, un género que se encuentra actualmente en ciertas partes de América Central y América del Sur, fue probablemente utilizada por primera vez por los pueblos nativos de Colombia hace más de mil años. La resina de *Elaeagia* se convirtió en un elemento esencial de los objetos, a menudo elaboradamente decorados, que se fabricaban durante la época colonial en la ciudad de Pasto, en el suroeste del país, donde se ha seguido utilizando hasta la actualidad, constituyendo la base de una tradición artesanal local. La resina también fue utilizada durante unos 300 años por los Incas, principalmente para decorar vasos ceremoniales llamados “queros”. La resina suele denominarse “mopa-mopa” y, concretamente en Colombia, “barniz de Pasto”. En este artículo se revisan la botánica, la química, las propiedades y el análisis de la resina de *Elaeagia*, y se hace un breve repaso de la historia de su uso.

**Palabras clave:** mopa-mopa; barniz de Pasto; quero; Inca; *Elaeagia*

**Cita:** Newman, R.; Kaplan, E.; Álvarez-White, M.C. la editorial durante la producción, ñ. La historia de la resina de *Elaeagia* (mopa-mopa), hasta la fecha. *Heritage* 2023, 6, 4320–4344. <https://doi.org/10.3390/heritage6050229>

Editor académico: Lucia Burgio,  
Dana Melchar and Monica Katz

Recibido: 31 de diciembre de 2022

Revisado: 17 de marzo de 2023

Aceptado: 20 de marzo de 2023

Publicado: 12 de mayo de 2023

**Nota del editor:** MDPI se mantiene neutral con respecto a las reclamaciones jurisdiccionales en los mapas publicados y las afiliaciones institucionales.

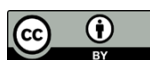

**Copyright:** © 2023 por los autores. Enviado para su posible publicación en acceso abierto bajo los términos y condiciones de la licencia Creative Commons Attribution (CC BY) (<https://creativecommons.org/licenses/by/4.0/>).

## Introducción

*Elaeagia* es un género vegetal menor de la gran familia de las Rubiáceas. Sus diferentes especies se encuentran en América Central y partes de América del Sur, con mayor abundancia en los Andes occidentales de Colombia, Ecuador y Perú. La resina de los árboles, aunque insoluble, se ablanda masticándola o calentándola en agua, se puede amasar mezclada con tintes o pigmentos y a continuación se estira (en caliente) para formar películas finas que pueden cortarse y aplicarse como decoración sobre madera y otros sustratos, sin necesidad de aplicar adhesivos.

Su uso histórico se limita a dos regiones geográficas distintas y a dos culturas diferentes que pueden o no haber tenido conocimiento del uso que hacía el otro grupo de la resina. Es probable que la resina se haya utilizado de forma continuada en el sur de Colombia durante más de mil años, y actualmente la utiliza un pequeño grupo de artesanos de Pasto (Colombia). Los objetos más conocidos decorados con la resina (la mayoría de los cuales se considera que se fabricaron en Pasto) son objetos de madera relativamente pequeños, como escritorios portátiles, creados entre mediados del siglo XVI y el siglo XVIII. Los “conocimientos y técnicas tradicionales asociados al barniz de Pasto mopa-mopa de Putumayo y Nariño” fueron inscritos en 2020 en la *Lista del Patrimonio Cultural Inmaterial que requiere medidas urgentes de salvaguardia* de la UNESCO (<https://ich.unesco.org/en/USL/traditional-knowledge-and-techniques-associated-with-pasto-varnish-mopa-mopa-of-putumayo-and-nario-01599>). Más al sur, en Perú, los Incas utilizaron la resina durante un periodo de aproximadamente 300 años, a lo largo del periodo colonial. Es posible que los Incas empezaran a utilizar la resina antes de la llegada de los españoles en 1532, pero esto es incierto. La mayoría de los objetos Inca decorados con la resina son pequeñas copas ceremoniales de madera (queros). No parece que la resina se haya utilizado en Perú tras el fin de la época colonial. En Colombia, un

equipo de científicos ha explorado recientemente el uso potencial de esta resina junto con fibras de fique para fabricar un composite de origen natural [1].

En este artículo se repasan la botánica, la química y la historia del uso de la resina, y se analiza su identificación en artefactos culturales.

### Especies de *Elaeagia* y su resina

Weddell, en su libro de 1849 basado en sus extensos viajes por Perú, Bolivia y Ecuador [2], propuso un nuevo género, *Elaeagia*, cuya característica esencial es la presencia de escamas redondas ricas en resina (estípulas) que son duras y protegen los brotes de las hojas en formación. Weddell observó que el árbol anteriormente denominado *Condaminea utilis* por Goudot [3] debería ser incluido en este nuevo género. En 1977, Mora-Osejo [4] propuso una nueva especie, *E. pastoensis*, llamada así por la ciudad de Pasto (Colombia), e indicó que la resina utilizada por los artesanos de Pasto en esa época pertenece a esta nueva especie y no a *E. utilis*, como se pensaba anteriormente. (Como resultado, algunos especímenes incluidos en colecciones botánicas antes de 1977 podrían haber sido clasificados erróneamente como *E. utilis*, u otra especie, a no ser que hayan sido reexaminados en años más recientes). Los científicos del siglo XIX que estudiaron la resina, algunas de sus propiedades químicas e informaron sobre su uso en Pasto incluyen a Humboldt [5] y Boussingault [6].

Entre las especies de *Elaeagia* más comúnmente recolectadas y descritas en los herbarios, se encuentran *E. pastoensis* y *E. utilis*. Con frecuencia ambas especies crecen en las mismas zonas, como indican, por ejemplo, los mapas de especímenes conservados y avis-tamientos de la base de datos en línea del Global Biodiversity Information Facility (GBIF) [7] (figuras 1-2).

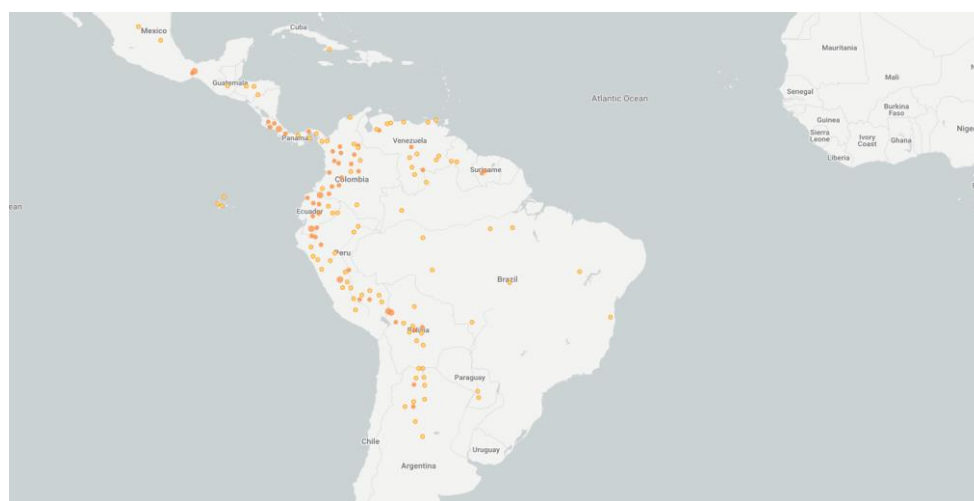

**Figura 1.** Ocurrencias de *Elaeagia utilis*, del Global Biodiversity Information Facility (GBIF). (Fuente: [www. https://www.gbif.org](https://www.gbif.org) [consultado el 22 de noviembre de 2022]).

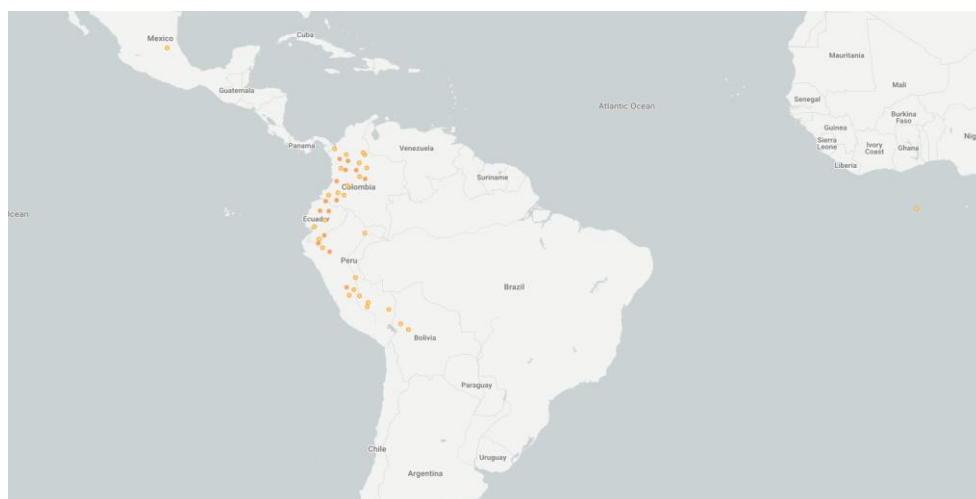

**Figura 2.** Ocurrencias de *Elaeagia pastoensis*, del Global Biodiversity Information Facility (GBIF). (Fuente: [www. https://www.gbif.org](https://www.gbif.org) [consultado el 22 de noviembre de 2022]).

En la base de datos de GBIF, *E. utilis* es con diferencia la especie más citada (más del 90% del total de ocurrencias recopiladas), mientras que el resto de ocurrencias se catalogan principalmente como *E. mariae*, *E. karstenii*, *E. pastoensis* y *E. myriantha*. No hay acuerdo sobre el número de especies del género: aunque la base de datos GBIF enumera actualmente 28, los científicos más familiarizados con el género reconocen muchas menos. Steyermark [8] reconoció 15 y, más recientemente, Maldonado [9] reconoció nueve (en la clasificación de Maldonado, *E. karstenii* se considera una variedad de *E. mariae*). La mayoría de las especies menos comunes están restringidas a países o regiones específicas. En 2018, Mendoza-Cifuentes y Aguilar-Cano [10] describieron una nueva especie de Colombia, una de las cinco especies raras que los autores señalan que solo se encuentran en ese país. Las cinco especies principales mencionadas anteriormente, que crecen en una amplia gama de países, se encuentran también todas ellas en Colombia.

Aunque todas las especies producen resina, Taylor [11] observó que sólo dos, *E. utilis* y *E. pastoensis*, producen grandes cantidades. Ambas son árboles esbeltos, de hasta 30 o más metros de altura. En el campo, estas dos especies se distinguen más fácilmente por sus hojas (figuras 3-4). Las hojas de *E. utilis* son, por término medio, más grandes y anchas que las de *E. pastoensis* [9]. Por el momento, se supone que la resina utilizada para decorar objetos procede probablemente de una de estas dos especies y, hasta la fecha, sólo se han analizado científicamente especímenes botánicos de resina de estas especies.

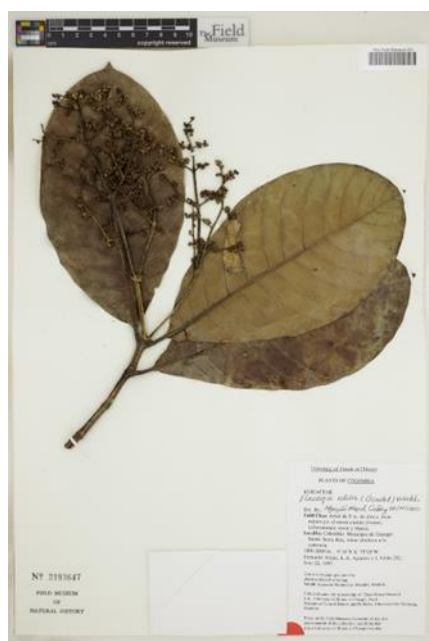

**Figura 3.** Espécimen botánico de *Elaeagia utilis* del Museo Field de Historia Natural. <https://db.field-museum.org/65ab1b9b-8653-4cc4-abe3-38b84afbf4eb>, FMNH2193647.

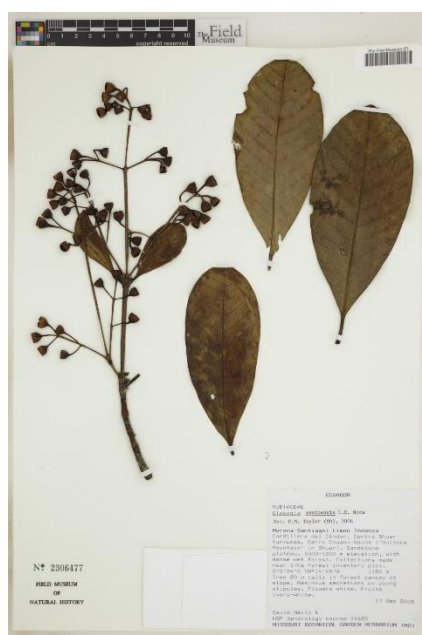

**Figura 4.** Espécimen botánico de *Elaeagia pastoensis* del Museo Field de Historia Natural. <https://db.fieldmuseum.org/d702bd03-2c92-499b-b023-b35dfb6cd9c7>, FMNH 2111075.

Las estípulas resinosas de ambas especies, pequeñas protuberancias redondeadas de menos de 1 cm de diámetro (figura 5), son muy duras y prácticamente insolubles. Los pequeños fragmentos sólidos de resina, tal y como se recogen de los árboles durante las estaciones de crecimiento, suelen ser transparentes y de color miel o ámbar, a veces teñidos de verde.

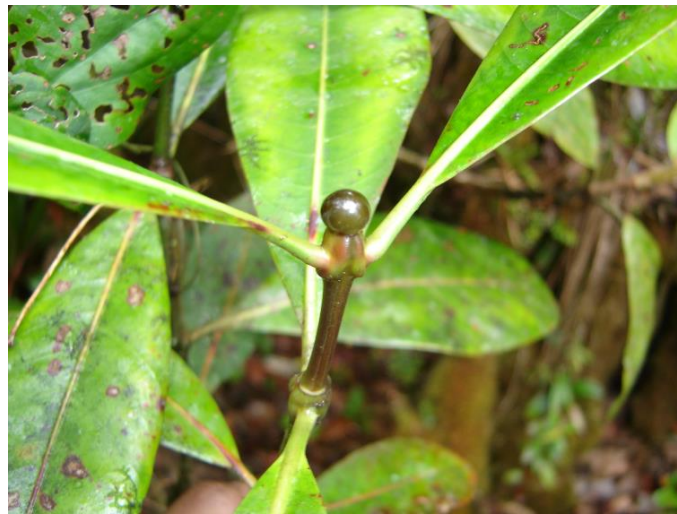

**Figura 5.** Estípulas en una rama de *Elaeagia pastoensis*. (Fotografía: J. Rodrigo Botina).

Antiguamente en América, como en otras partes del mundo, las resinas cuyos componentes sólidos son principal o totalmente diterpenoides o triterpenoides se han utilizado para una amplia gama de fines [12-18]. Ejemplos concretos van desde los aglutinantes de pinturas sobre cerámica de la cultura Paracas (región de Ica, Perú; ca. 800-100 a.C.) [16] hasta las materias primas excavadas en el yacimiento azteca del Templo Mayor en la actual Ciudad de México (construido a partir de 1325 y destruido en 1521) [15]. Sin embargo, las resinas constituidas principalmente por compuestos fenólicos están menos extendidas que las resinas terpenoides: las resinas fenólicas más conocidas son, con diferencia, las savias que constituyen la materia prima de las lacas asiáticas [12]. La resina de *Elaeagia* es una resina fenólica cuyo comportamiento es bastante inusual. Ablandada al masticarla o calentarla en agua, la resina puede formar finas láminas o largas cuerdas sin romperse. Resulta sorprendente que una masa de 0,5 kg pueda estirarse hasta formar una cuerda de 3-4 mm de diámetro y 100 metros de longitud [19] (p. 129). La resina se endurece con relativa rapidez al enfriarse, perdiendo la mayor parte de su maleabilidad, pero ésta puede renovarse calentándola de nuevo, al menos mientras está relativamente fresca. En objetos antiguos con decoraciones que contienen resina, ésta puede hacerse algo maleable con una espátula térmica.

Como ocurre con muchos materiales utilizados en el patrimonio cultural, probablemente nunca se conocerá la historia más antigua del uso de esta resina. Se puede imaginar que la gente se fijaba en las pequeñas bolas casi parecidas a bayas que crecían de los extremos de las ramas de ciertos árboles esbeltos durante las estaciones de crecimiento. Masticar las bayas habría demostrado rápidamente que no eran comida, pero la masticación habría convertido las "bayas" en una sustancia gomosa que probablemente era bastante única entre los materiales vegetales disponibles para estas personas. Si se combinaban muchas de las bolitas y se masticaban o calentaban juntas, y se eliminaban trozos de material vegetal durante este sencillo proceso, se podría acumular una masa suficientemente grande de resina maleable que sería útil para dar forma a pequeños objetos. Si las extremas propiedades de estiramiento eran apreciadas, otros usos también pudieron haber sido imaginados. El hecho de que una fina capa de la resina es impermeable al agua, probablemente también se observó durante los primeros experimentos con la resina.

### Terminología

"Mopa-mopa" es un término de origen desconocido. La publicación más antigua en la que se utiliza este término (que los autores conozcan) es la de Juan y Ulloa en 1748 [20] en una breve descripción de objetos fabricados en Pasto, Colombia. Jijón y Caamaño y Larrea [21] puede ser la primera publicación (1918) que relaciona la mopa-mopa con los

queros Incas. Mopa-mopa es actualmente un nombre común para la resina de *Elaeagia* en los dos contextos culturales en los que ha sido (o sigue siendo) utilizada.

"Barniz de Pasto" es un término que apareció por primera vez durante el periodo colonial para referirse a los objetos fabricados en Pasto que estaban decorados (al menos en parte) con resina de *Elaeagia* [22]. Hoy en día, el término se refiere a la resina en sí y a los objetos que actualmente se fabrican en Pasto y son decorados allí por artesanos locales. El término también se utiliza para referirse a los objetos fabricados en la región de Pasto a lo largo de la historia conocida que incluyen la resina. Los primeros escritores españoles que vieron objetos decorados con la resina no sabían cómo se recolectaba la materia prima ni cómo se aplicaba. Una superficie cubierta con una fina capa de la resina puede parecer brillante y podría confundirse con una superficie recubierta con una capa líquida de barniz, de ahí la comprensible confusión temprana y el uso del término "barniz." En 2011, la Superintendencia de Industria y Comercio de Colombia estableció "Mopa Mopa Barniz de Pasto" como nombre protegido que indica el material auténtico utilizado en Pasto [23].

En el estudio de los queros incaicos, los decorados con resina de *Elaeagia* se han calificado a veces de "pintados", más a menudo de "lacados". Como en el caso de "barniz", estos no son usos precisos de las palabras tal como se definen actualmente. Sin embargo, Tom Cummins (comunicación personal 2022) ha argumentado razonablemente que en el pasado "pintado" se utilizaba en un sentido amplio para indicar diferentes formas de aplicar color a una superficie. En documentos de los siglos XVI-XVIII, los queros Incas del periodo colonial eran a menudo denominados "llimpi" ('llimpi' es un término quechua que puede referirse a los materiales coloreados aplicados para decorar los queros o al proceso de aplicación de dichos materiales coloreados).

### **Composición de las resinas de *Elaeagia***

Las rutas biosintéticas por las que se producen las resinas fenólicas son complejas y no se conocen a fondo, pero en una visión simplificada, como la esbozada por Langenheim [12], se señalan dos como particularmente importantes: las vías del ácido shikímico/fenilpropanoide [24,25] y la vía del ácido malónico [26] (figura 6). La primera conduce a los fenilpropanoides, que representan los componentes estructurales "monoméricos" básicos de la resina. La segunda contribuye a la producción de flavonoides que son responsables de al menos parte del color de la resina cruda, pero que estarían presentes como moléculas aisladas que no contribuyen a la estructura y el comportamiento de la resina en sí.

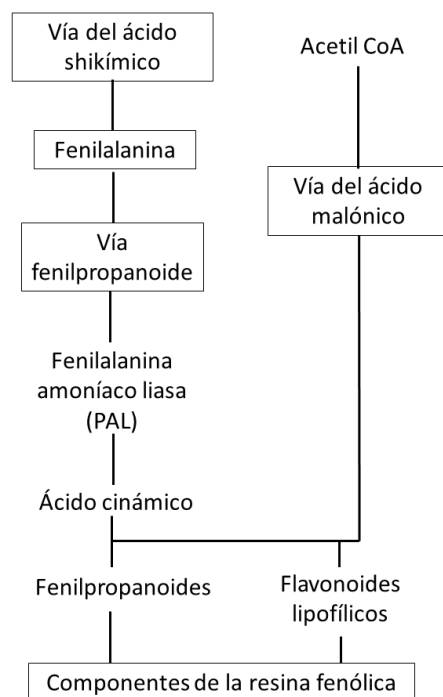

**Figura 6.** Esquema de las vías biosintéticas para la producción de resinas fenólicas en plantas. (Redibujado según Langenheim [12].).

Biftu y Stevenson [27] realizaron extracciones con solventes exhaustivas de una muestra de resina de *Elaeagia* (identificada como *E. utilis* comprada en el mercado comercial de Pasto, Colombia, pero probablemente *E. pastoensis*) y a partir de esos extractos identificaron específicamente varios triterpenoides así como la flavona apigenina, todos los cuales, sin embargo, son sólo componentes menores de la materia prima.

La resina *Elaeagia pastoensis* es prácticamente inelástica y sólo ligeramente maleable a temperatura ambiente, con una baja resistencia a la tracción (7,2 MPa a 47% HR) [28]. La resina absorbe poca agua, prácticamente ninguna a 47% HR, 1,5-2,0% a 97% HR. La difracción de rayos X indica que el material mínimamente procesado es semicristalino. El análisis termogravimétrico (TGA) indica cierta pérdida a 99°C (probablemente solventes residuales del procesado en agua y alcohol que se llevó a cabo en la muestra que se probó), luego una disminución gradual y continua de la masa a partir de 200°C, con pequeñas mesetas a 312°C y 378°C, culminando en una pérdida completa a 450°C. Estas observaciones sugieren que la química de la resina fenólica es compleja e implica componentes al menos ligeramente distintos que se degradan a diferentes temperaturas. Sin embargo, estas observaciones no tienen relación directa con la degradación del material por el procesado normal para su uso como material decorativo (que se lleva a cabo a temperaturas relativamente bajas) o su envejecimiento natural a temperatura ambiente.

Sólo las resinas de *E. pastoensis* y *E. utilis* han sido objeto de algún estudio científico hasta la fecha. Newman et al. [29] analizaron la resina de especímenes botánicos de estas especies mediante microespectroscopía infrarroja por transformada de Fourier (FTIR), cromatografía de gases/espectrometría de masas por pirólisis (pyGC/MS) y cromatografía líquida/espectrometría de diodos en fila/espectrometría de masas (LC/DAD/MS). Hasta la fecha, no se han abordado las propiedades físicas de *E. utilis*, por lo que no se pueden comparar con los escasos datos de *E. pastoensis*.

### Identificación analítica de las resinas de *Elaeagia*



La resina de *Elaeagia* (de las dos especies estudiadas hasta la fecha) puede distinguirse de otras resinas naturales mediante espectrometría FTIR (figura 7); los espectros de referencia de algunos especímenes de *Elaeagia* de estas dos especies están disponibles en la base de datos del Infrared and Raman Users Group (IRUG) ([www.irug.org](http://www.irug.org)).

Con el fin de comparar los espectros de la resina de *E. utilis* y *E. pastoensis*, se preparó una biblioteca espectral FTIR de referencia de 18 especímenes de la primera y 6 de la segunda (Apéndice 1, tabla A1) y se evaluó mediante análisis de componentes principales (PCA). Aunque existen sutiles diferencias entre los espectros de la resina de algunas muestras de las dos especies, el PCA indica que no pueden distinguirse de forma fiable mediante esta técnica.

Las dos especies se distinguen mejor en las vibraciones de estiramiento C=O (1750–1690  $\text{cm}^{-1}$ ; figura 8), pero hay solapamiento. Los especímenes de *E. utilis* presentan a menudo dos picos amplios superpuestos: el que muestra mayor absorbancia a ca. 1705–1715  $\text{cm}^{-1}$ , y otro con menor absorbancia a ca. 1725–1735  $\text{cm}^{-1}$ . Las muestras de *E. pastoensis* también presentan a menudo dos picos superpuestos en los mismos rangos generales, pero el último presenta con frecuencia una absorbancia mayor que el segundo (figura 9). La absorción de mayor número de onda se debe a los ésteres de las resinas.

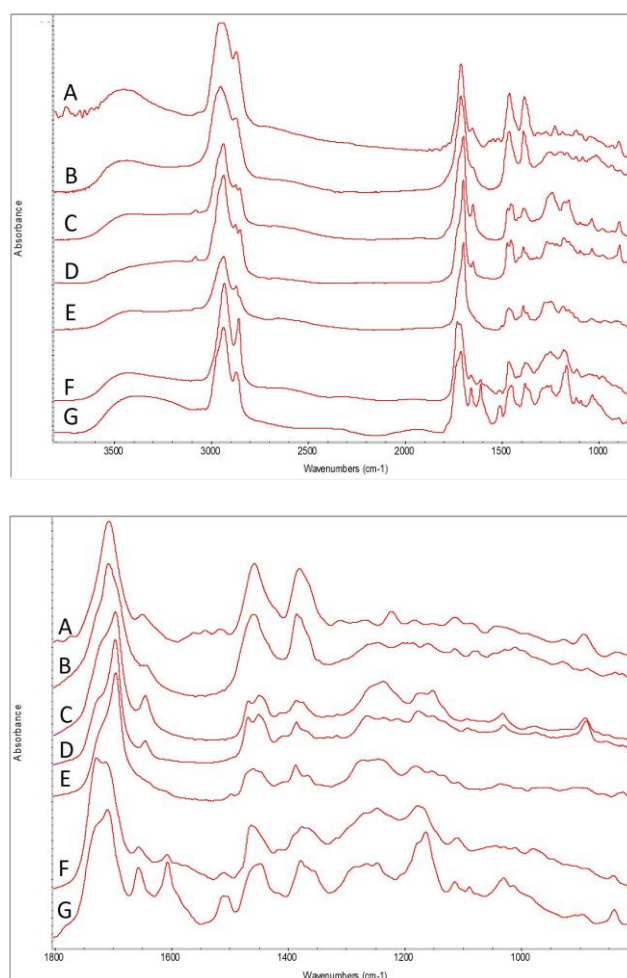

**Figura 7.** Espectros de absorbancia FTIR de varias resinas diterpenoides y triterpenoides (A-E, espectros de la base de datos [irug.org](http://www.irug.org), números de identificación espectral indicados) y muestras de referencia de resinas *Elaeagia pastoensis* (F, Museo Field 22226159) y *Elaeagia utilis* (G, Museo Field 999470). A, damar (INR00082). B, almáciga (o mastic) (INR00067). C, copal de Manila (INR00092). D, sandaraca (INR00091). E, colofonia (resina de pino, INR00114). Espectros completos en el panel



superior; espectros entre 1800-800 números de onda en el panel inferior. Ejes Y ajustados arbitrariamente para facilitar la comparación.

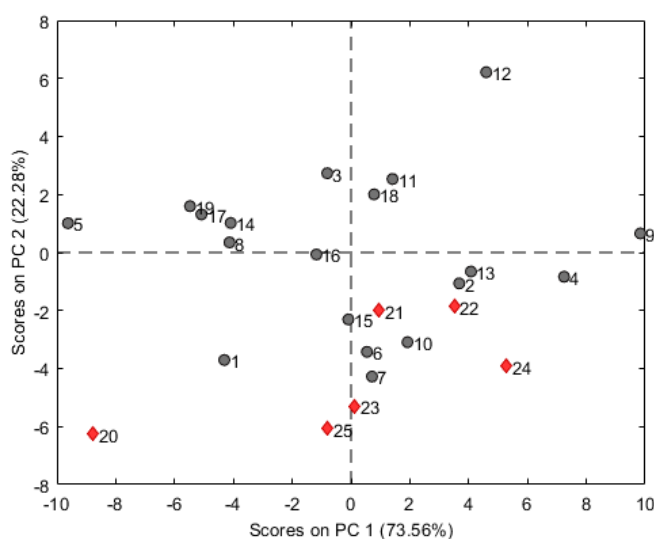

**Figura 8.** Gráfico del componente principal 1 frente al componente principal 2 de los espectros FTIR de muestras de resina de referencia de *Elaeagia utilis* (18 muestras; puntos negros) y *Elaeagia pastoensis* (6 muestras; triángulos rojos). Los espectros se evaluaron en el intervalo 1750-1690 cm<sup>-1</sup>.

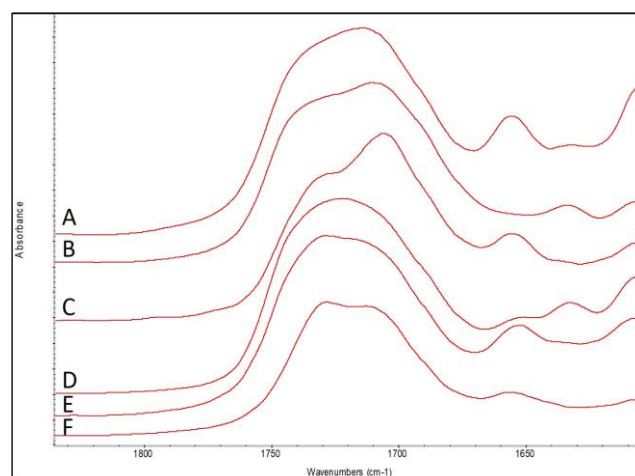

**Figura 9.** Detalles de los espectros de absorbancia FTIR de tres muestras de referencia de resina de *Elaeagia utilis* (A-C) y tres de resina de *Elaeagia pastoensis* (D-F). A, Museo Nacional Smithsonian de Historia Natural 2165540. B, Museo Nacional Smithsonian de Historia Natural 2166582. C, Museo Field 2184875. D, Jardín Botánico de Missouri 5834698. E, Jardín Botánico de Missouri 4571036. F, Museo Field 22226159. Ejes Y ajustados arbitrariamente para facilitar la comparación.

Los análisis Py GC/MS de resina de las dos especies se han realizado hasta la fecha mediante derivatización por un reactivo de transmetilación, hidróxido de tetrametil amonio (TMAH), un reactivo comúnmente utilizado para la pirólisis de muestras del patrimonio cultural y otros campos [30,31]. Es de esperar que la pirólisis de la resina con este reactivo dé cromatogramas que incluyan compuestos pequeños y volátiles que no se descomponen a la temperatura de pirólisis, fragmentos de moléculas que sí se descompusieron durante la pirólisis y derivados metilados de algunos fragmentos pirolizados o derivatizados, dependiendo de sus estructuras y composiciones. La pirólisis es una metodología lógica para caracterizar lo que podrían considerarse "monómeros" de la matriz polimérica de las resinas de *Elaeagia*, en gran medida insolubles, aunque no proporciona información sobre la estructura del polímero o polímeros originales.

Algunos componentes típicos identificables en los pirogramas de todos los especímenes botánicos son los derivados del glicerol, los ácidos grasos y los derivados de los flavonoides (en particular la trimetilapigenina). Estos compuestos o sus cantidades relativas no pueden considerarse diagnósticos para estas resinas [29]. De mayor valor diagnóstico para la presencia de resinas de *Elaeagia*, a primera vista, es la presencia de ácido p-metoxicinámico y ácido 3,4-dimetoxicinámico. El primero es sistemáticamente más abundante en *E. utilis* que en *E. pastoensis* (figura 10). Parece probable que estos dos compuestos estén presentes en las resinas en forma de ésteres, pero la composición de los ésteres en las dos especies debe diferir en ciertos detalles (figura 10). Dado que el reactivo de derivatización utilizado para la pirólisis puede metilar grupos hidroxilo activos, no es seguro que los componentes originales de ácido cinámico sustituido de la resina estuvieran en las formas metoxiladas específicas detectadas por pyGC/MS.

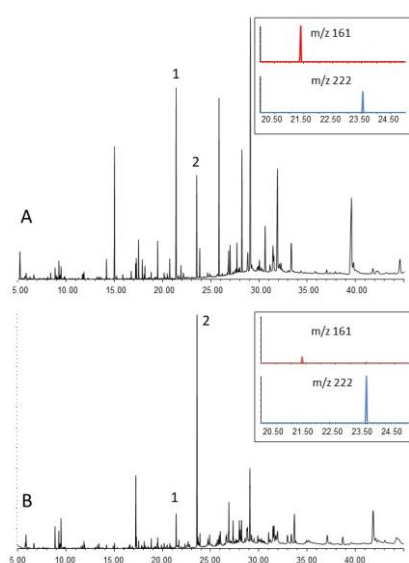

**Figura 10.** Pirogramas de análisis py GC/MS de muestras de *Elaeagia*. A. *E. utilis* (Museo Nacional Smithsonian de Historia Natural 1770637). B. *E. pastoensis* (Jardín Botánico de Missouri 3012033). Inserciones: cromatogramas de iones seleccionados, indicando las posiciones de los picos para los ésteres metílicos del ácido p-metoxicinámico ( $m/z$  161, arriba) y del ácido 3,4-dimetoxicinámico ( $m/z$  222, abajo), que están etiquetados como 1 y 2 respectivamente en los pirogramas.

En el Apéndice 2 se comparan los pirogramas de muestras de referencia de *E. pastoensis* realizados por dos laboratorios que utilizan pirolizadores diferentes.

Poco se sabe sobre los cambios químicos o físicos que puede sufrir la resina en las finas capas decorativas aplicadas a la superficie de los objetos. En querens de cientos de años de antigüedad, las capas que contienen *Elaeagia* presentan a menudo craquelado, lo que quizá indique que el envejecimiento ha reducido la leve maleabilidad original de la resina a temperatura ambiente [32]. Sin embargo, el craquelado no suele observarse en objetos de Pasto de edad similar (o algo más jóvenes). Esto puede deberse a diferencias en el procesado y la aplicación de la resina, a factores ambientales que influyen en los procesos de envejecimiento o incluso a la(s) fuente(s) original(es) de la resina. Se ha sugerido que la resina puede experimentar decoloración con el paso del tiempo, pero por el momento se desconoce en qué medida esto se produce. Los espectros FTIR de muestras de objetos con cientos de años de antigüedad pueden parecerse mucho a los de las muestras de herbario, lo que sugiere que los cambios químicos debidos al envejecimiento pueden haber sido relativamente menores, y la caracterización mediante técnicas cromatográficas tampoco implica alteraciones muy extremas. Que existen diferencias en las propiedades de la resina recolectada de árboles de distinta edad y que la masticación puede producir

efectos no idénticos a los que se obtienen al hervir la resina en agua fue señalado por Humboldt [5], pero tales diferencias aún no han sido abordadas por la investigación científica.

La LC/DAD/MS aplicada a extractos de especímenes botánicos en metanol/agua calentados ha sido útil sobre todo para la identificación de flavonoides. El principal en ambas especies es la apigenina (se trata del mismo flavonoide que puede identificarse, en forma derivatizada, en los pirogramas). A partir de estos cromatogramas se puede hacer una distinción sencilla entre las dos especies: la luteolina es un componente menor de *E. pastoensis* pero está prácticamente ausente de *E. utilis*, y el éter monometílico de la apigenina (posiblemente 7-metilapigenina, genkwanina) es un componente significativo de *E. utilis* pero está ausente en *E. pastoensis*. El contenido en flavonoides puede considerarse diagnóstico, pero debe tenerse en cuenta que tintes vegetales amarillos que contienen flavonoides pueden haber sido utilizados como colorantes en la resina aplicada a ciertos artefactos, y muchos de estos tintes vegetales [33] contienen algunos de los mismos flavonoides que están presentes en la propia resina.

Aunque podría suponerse que los flavonoides de la resina recién recolectada fueron eliminados, o al menos muy mermados, por el extenso procesamiento al que fue sometida la resina antes de ser empleada con fines decorativos, los análisis de muestras de decoraciones aplicadas sobre diversos objetos detectan fácilmente flavonoides de los mismos tipos y cantidades relativas detectados en las muestras botánicas [29].

### La resina de *Elaeagia* en la Colombia precolonial

El uso más antiguo que se conoce de la resina de *Elaeagia* es probablemente el de las cuentas fabricadas por los indígenas del suroeste de la actual Colombia. En las excavaciones realizadas en 1974-1975 en el Alto de Lavapatas, dentro del actual parque arqueológico de San Agustín, los arqueólogos informaron del hallazgo de varios cientos de cuentas de collar en tumbas [34,35]. Descritas como "posiblemente hechas con mopa mopa", las cuentas estaban "formadas por cientos de piezas colocadas en cordones alrededor de los cuellos de los cadáveres, un conjunto armonioso de bandas de color gris, marrón y crema, algunas de ellas tubulares y otras redondas" [28]. El yacimiento de San Agustín (a unos 130 km al noreste de Pasto) contiene túmulos funerarios con estatuas megalíticas, entre otros muchos artefactos, que datan del periodo Clásico Regional (1-900 d.C.), aunque el lugar estuvo habitado continuamente hasta aproximadamente 1350 d.C. [36]. Según se informa, se encontraron cuentas similares en tumbas fechadas entre los siglos IX-XIII en Miraflores, una región a unos 55 km al sur de Pasto [37]. Desgraciadamente, se desconoce la ubicación actual de las cuentas de estas dos excavaciones.

Durante las excavaciones de 1992 en Tajumbina [38], un yacimiento situado aproximadamente a medio camino entre Pasto y San Agustín, se encontraron unas 250 cuentas en un enterramiento primario y otro secundario. *Elaeagia* se ha identificado tentativamente en muestras de estas cuentas, que se conservan actualmente en el Instituto Colombiano de Antropología e Historia (ICANH).

La mayoría de las cuentas de resina son tubulares, normalmente de 0,5-2 cm de longitud (figura 11). Presentan una limitada gama de colores, desde el negro al marrón, pasando por el beige pálido o el blanco. Las pocas que se han estudiado con cierto detalle proceden de colecciones privadas y no tienen documentación de procedencia. El análisis radiocarbónico de una de estas cuentas indicó una fecha de 899-1001 d.C. [39].

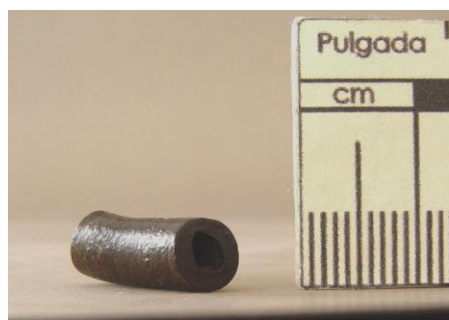

**Figura 11.** Cuenta de resina *Elaeagia* de Colombia, procedencia desconocida. (Muestra y fotografía: Maria Cecilia Álvarez-White).

La antigüedad de estas cuentas de *Elaeagia* podría variar, pero si es del orden de mil años o más, su aparición en tumbas situadas a una distancia de hasta 200 km entre sí (la distancia directa aproximada entre Miraflores, hacia el noreste, y San Agustín) podría indicar un considerable comercio temprano de cuentas de *Elaeagia*, o tal vez un amplio conocimiento temprano sobre la recolección, procesamiento y utilización de la resina.

Mientras que algunas cuentas son de color uniforme (probablemente simplemente el color parduzco de la propia resina), otras muestran uno o dos colores más (blanco y negro) en bandas oblicuas. Presumiblemente, se fabricaban formando finas láminas de resina (de distintos colores), colocándolas una al lado de la otra y adhiriendo los bordes cortados con calor y presión, para luego enrollar el material multicolor alrededor de un fino núcleo cilíndrico y formar un tubo de resina. Una vez retirado el núcleo, se podían cortar cuentas individuales del largo cilindro. Las causas de los colores de estas cuentas son inciertas por el momento.

### ***Elaeagia* en Colombia durante el periodo colonial**

Pasto fue fundada por los españoles en 1537. Fray Gerónimo de Escobar pasó por Pasto en 1582. En su crónica de la región de Timaná, situada a varios kilómetros al este de San Agustín, uno de los yacimientos en los que se han excavado cuentas de *Elaeagia*, hace una mención algo confusa de lo que casi con toda seguridad es resina de *Elaeagia*. Escribió:

"...con escasa población indígena y sin minas cercanas, la principal actividad agrícola aquí es hacer conservas, pues hay mucha miel en los árboles de esa tierra y con los frutos hacen conservas; también de unas semillas que crecen allá en esa tierra llamadas maní, usándolas como una especie de almendras hacen unos panes de turrón, y con estas conservas y unos bordones pintan allí los indios de un betún galano de muchos colores, que todo lo envían a vender los vecinos a las minas de Almaguer y otras partes a do hay oro..." [40] Gerónimo no hizo mención de que la resina se utilizara en el mismo Pasto. Castellvi [42] afirmó que los indios familiarizados con el uso del barniz con fines decorativos fueron traídos a Pasto poco después de la fundación de la ciudad en 1537, pero esto no parece ser verificable. Humboldt [5] afirmó que se decía que una mujer particular que poseía parcelas de tierra en el Timaná había "inventado la manera de barnizar como se hace hoy [en Pasto]" desde el principio de la conquista.

En 1827, Hamilton [41] se refirió brevemente a los cuencos de madera "adornados con flores de colores muy brillantes" que se fabricaban en la pequeña ciudad de Timaná. Escribió que "un alto barniz se coloca sobre el conjunto, que los indios de la provincia de Timaná extraen de una planta....[Estos cuencos] se pueden utilizar con agua caliente sin daño." Aunque no es seguro, probablemente se refería a cuencos decorados con resina de *Elaeagia* teñida. De ser así, parece existir una tradición secular de uso de esta resina en la región.

La mayoría de los objetos decorados que se conservan en Colombia, casi todos los cuales se consideran fabricados en Pasto, tienen sustrato de madera. Entre los objetos de madera decorados con resina de *Elaeagia* más conocidos se encuentran escritorios portátiles, aparadores en miniatura, baúles, atriles y bandejas, ejemplos de los cuales han sido objeto de varios estudios recientes [43–48]. La mayoría de los objetos conservados no están fechados con seguridad, pero se considera que se fabricaron a mediados del siglo XVII o más tarde. En muchos de ellos, las decoraciones de resina cubren prácticamente toda la superficie.

Las calabazas también eran un sustrato habitual. Un estudio reciente de un objeto de este tipo de la colección de la Hispanic Society Museum & Library incluía una datación por radiocarbono que situaba el objeto entre 1522 y 1638, con un 95% de probabilidad [33]. Por tanto, esto sugeriría que la calabaza decorada pudo fabricarse en el siglo XVI. Por lo que se sabe hasta el momento, aunque basado en comparativamente pocos análisis, *E. pastoensis* fue la resina específica utilizada para decorar objetos de la época colonial producidos en Pasto [29], incluyendo la calabaza que acabamos de señalar.

En un libro publicado en 1627, Fray Pedro Simón señaló que la resina se utilizaba en Quito, Ecuador [49]; el libro no mencionaba a Pasto. Se cree que algunos objetos de la época colonial decorados con mopa-mopa pueden haber sido hechos en esta ciudad, que está a unos 200 km al suroeste de Pasto. Actualmente se desconoce la historia del uso de la resina más allá de Pasto durante el periodo colonial.

Existe una posible brecha de siglos entre las cuentas de *Elaeagia* y los objetos señalados por escritores europeos que fueron fabricados en la región de Timaná (de los cuales no se conocen especímenes en la actualidad). Se han publicado varios estudios de documentos históricos relacionados (o posiblemente relacionados) con el uso de la resina *Elaeagia* en Colombia [50–56].

### Algunas características del uso de la *Elaeagia* en el período colonial en Pasto

Se han reconocido dos amplias técnicas de aplicación en objetos de la época colonial de Pasto: "barniz brillante" y "barniz mate." [43,57]. La primera se caracteriza por el uso abundante de pan de plata con capas muy delgadas de resina tintada. En la segunda técnica no se utiliza pan de plata. Las capas finas de resina de *Elaeagia* sin pigmentar son transparentes y generalmente de color miel (probablemente, aunque no necesariamente en su totalidad, por pequeñas cantidades de flavonoides). La adición de compuestos orgánicos coloreados que son transparentes o tienen partículas de tamaño muy fino (como el índigo, la cochinilla o los colorantes amarillos) crea una capa tintada pero muy transparente, que puede aplicarse sobre la plata, actuando de forma parecida a como lo haría un esmalte aplicado sobre una hoja de metal en una pintura al óleo. En un estudio de una calabaza de la colección de la Hispanic Society Museum & Library, Pozzi et al. [33] mostraron que la estructura de las capas en algunas zonas era bastante compleja, presumiblemente debido al recubrimiento parcial de algunos elementos decorativos con otros a medida que se desarrollaba el diseño final, o quizás incluso a modificaciones del diseño en algunos lugares. En dos muestras, el pan de plata estaba cubierto con finas capas rojas transparentes (10–20  $\mu\text{m}$ ); en otra, con una capa verde transparente más gruesa (100  $\mu\text{m}$ ); y en otra, con una fina capa azul transparente (10–20  $\mu\text{m}$ ). En las secciones transversales más completas, parece que una gruesa capa de resina subyacente (quizás sin tinte) sirve de sustrato para la hoja metálica.

Un escritorio portátil del Hispanic Society Museum & Library se muestra en la figura 12. El objeto está fechado (por una inscripción) hacia 1684 (). El examen visual revela la forma básica de aplicación, aunque no se han tomado secciones transversales de este objeto. En el interior de la tapa del escritorio (figura 13), la capa más baja visible es beige y opaca (con pigmento blanco de plomo) y sirve como base a todas las decoraciones. Las partes más oscuras son una capa que contiene índigo, que si está suficientemente concentrado en la resina, tiene un color casi negro. Los elementos decorativos rojos, verdes y azules brillantes parecen consistir en estructuras de tres capas, empezando por una capa

de resina sin tintar, adherida a la capa de fondo opaca. Encima hay una hoja de plata con una capa superior transparente teñida: un rojo orgánico para el rojo, una cantidad bastante importante de índigo para el azul y una pequeña cantidad de índigo para el verde. Este último puede tener un tinte verde procedente de la propia resina, o tal vez se le añadió un colorante amarillo. Estas decoraciones sobresalen un poco por encima del fondo, el ligero relieve aparentemente deliberado, que fue posible gracias a la capa de resina no tintada, bastante gruesa. La capa inferior se extiende más allá de las dos superiores, por lo que parece que se recortaron finos “sándwiches” de pan de plata superpuestos a una capa de resina transparente tintada y se aplicaron a la capa inferior gruesa sin tintar, lo que dio relieve al conjunto de los elementos decorativos. Obsérvese una minúscula astilla de pan de plata errante recubierta por el vidriado rojo, adherida a la capa de fondo cerca de una de las decoraciones. En los objetos que se conservan, el pan de plata suele permanecer intacto si se ha protegido con una capa de resina de *Elaeagia*.

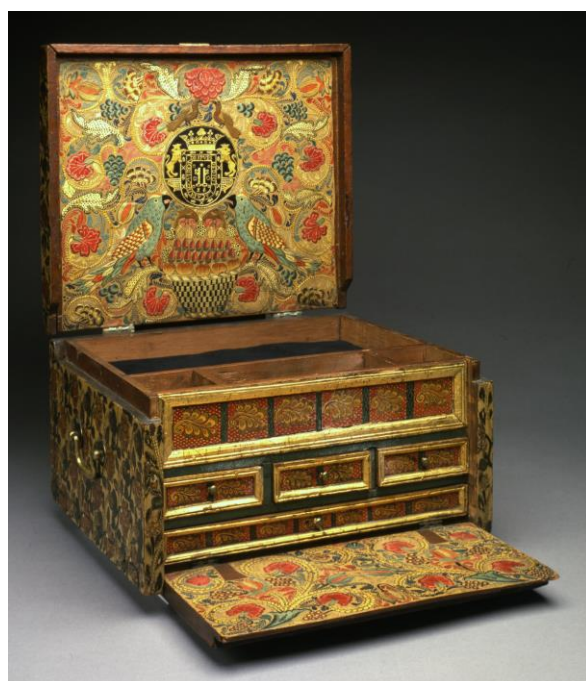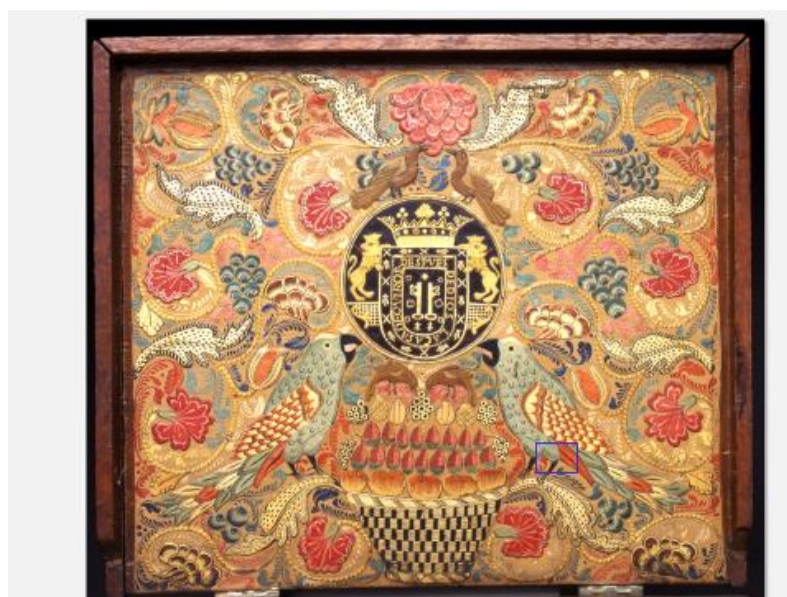



**Figura 12.** Escritorio portátil, ca. 1684. Altura 19 cm. Hispanic Society Museum & Library, LS2000. Abajo: Vista del interior de la tapa. El recuadro azul (cerca de los pies del pájaro a la derecha) muestra el área incluida en la fig. 13. (Fotografías: cortesía de Monica Katz).

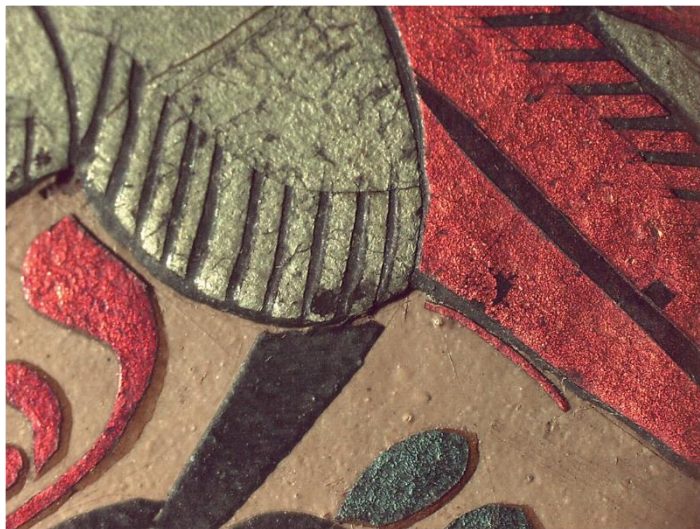

**Figura 13.** Detalle de la decoración del interior de la tapa del Hispanic Society Museum & Library LS2000 (fig. 12). El detalle incluye algunas plumas verdes y rojas del ave, así como parte de una pata. Anchura del área: 2,5 cm. (Fotografía: Richard Newman).

Hay algunos ejemplos de otros tipos de artefactos en los que se utilizó o se sugiere que se utilizó resina de *Elaeagia*. La técnica del "barniz brillante" se utilizó para decorar motivos florales tallados en bajo relieve en una serie de marcos de cuadros, probablemente fabricados en Colombia hacia finales del siglo XVII o poco después [58]. La técnica se utilizó en partes de una pequeña escultura de madera (de unos 35 cm de altura) del *Rey Mago Gaspar*, probablemente del siglo XVIII, en una colección de Bogotá, Colombia. Los tonos de la carne de la figura se ejecutaron con pintura al óleo y toda la decoración de la ropa y las joyas se realizó con la técnica del "barniz brillante" [59].

Stuckart [19] hizo un resumen del uso de la resina a principios del siglo XX. Un humilde ejemplo son unos cuencos muy pequeños (de unos 3 cm de altura) comprados en Pasto en 1929 que contienen decoraciones sencillas de *Elaeagia*, además de otros materiales (figura 14). Estos cuencos datan de pocos años antes del renacimiento de la técnica del barniz de Pasto, según la reseña de Stuckart.



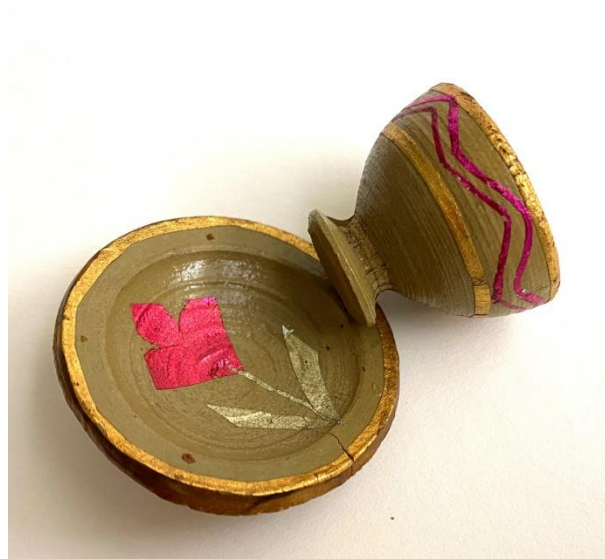

**Figura 14.** Cuenco, adquirido en Pasto, Colombia, en 1929. Las decoraciones son de resina de *Elaeagia* tintada, aplicada sobre pintura o barniz (de composición diferente). Diámetro del platillo: 4,5 cm. Museo Nacional Smithsonian de los Indios Americanos 18/2849 (taza) y 18/2848 (platillo). (Fotografía: Emily Kaplan).

### Resina de *Elaeagia* en Perú: queros y otros artefactos Incas

Los queros son recipientes ceremoniales de madera para beber, fabricados y utilizados en pares durante siglos antes de la llegada de los españoles a los Andes centrales y meridionales [60]. El ritual de brindar y beber chicha (cerveza fermentada de maíz y frutas) en pares de queros cumplía importantes funciones culturales en el establecimiento y mantenimiento de relaciones recíprocas dentro de las comunidades. Bajo el Estado Inca, la ceremonia de beber chicha definía y reforzaba las relaciones recíprocas y jerárquicas del Estado con las poblaciones que lo componían. Los queros producidos por artesanos especializados (querocamayoc) se distribuían a las élites políticas que cooperaban con el Imperio Inca. Tras la conquista española, la decoración de los queros incorporó la estética europea, incluyendo una amplia paleta de colores, representaciones de figuras humanas y animales y formas de vasijas europeas.

Las primeras decoraciones de los queros de madera eran diseños geométricos tallados (o incisos) poco profundos. Basándose en algunos ejemplos excavados, parece que los Incas empezaron a utilizar resina de *Elaeagia* en la decoración de los queros cerca o poco después del periodo colonial. En los ejemplos más típicos, las áreas planas poco profundas talladas en la superficie estaban incrustadas con resina [61]. Las incrustaciones solían estar enrasadas con la superficie de madera circundante. Aunque el grosor de estas incrustaciones variaba, las que se utilizaban para realizar los campos de color más grandes son de unos cientos de micras de grosor.

Es de suponer que el objeto y la resina se calentaron para facilitar la adhesión de la decoración a la madera. Aunque a veces se han observado acreciones o posibles revestimientos sobre capas de *Elaeagia* en queros, hasta la fecha no ha habido indicios definitivos de que las capas decorativas originales se cubrieran con otros materiales. Las incrustaciones que se conservan presentan a veces características texturales inusuales que actualmente no tienen explicación [32].

Un único quero fragmentario recientemente excavado en Moqi, un yacimiento en la frontera entre Perú y Bolivia, se considera que formó parte de un banquete ritual [62]. La datación por radiocarbono (con un nivel de confianza del 95,4%) dio un rango calibrado de 1407-1443 para la madera y de 1473-1600 para la resina. La datación de la decoración se sitúa en la frontera entre el periodo imperial tardío y la llegada de los españoles en 1532. En este yacimiento también se encontraron queros sin resina de *Elaeagia*. La

datación más temprana de la madera de este quero puede deberse a la edad de las partes del árbol utilizadas en el objeto (y de las que se tomaron muestras para el análisis), y no corresponderse con la fecha de talla. También existe la posibilidad de que se haya utilizado una pieza de madera talada con anterioridad.

Un par de queros excavados en una tumba del sitio Inca de Ollantaytambo, sitio que se considera data de 1537-39, son otros ejemplos tempranos del uso de la resina *Elaeagia* [63]. Los diminutos felinos, seis en cada uno de los queros, están ejecutados con maestría, lo que sugiere una considerable experiencia con el material por parte de los artesanos que llevaron a cabo la decoración (figura 15). Al parecer, hubo un periodo anterior de uso de esta resina por parte del Incas, hasta ahora desconocido, que presumiblemente data de antes de la llegada de los españoles.

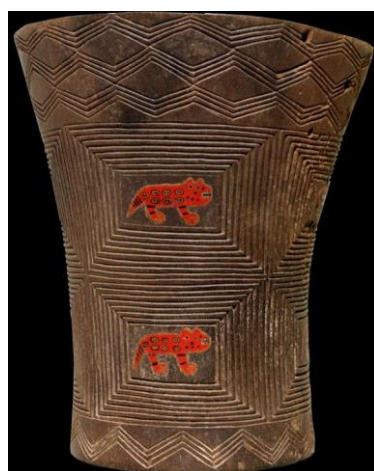

**Figura 15.** Uno de un par de queros excavados en Ollantaytambo, Perú, en 1936. Altura 15 cm. Museo Inca (Cuzco, Perú) 229. Cada quero está decorado con pequeños felinos (de unos 3,0 cm de longitud en este caso) hechos de resina de *Elaeagia* teñida de rojo, amarillo y negro. (Fotografía: Emily Kaplan).

La mayoría de las incrustaciones de los queros son opacas, pero algunas eran translúcidas o incluso transparentes, sobre todo las teñidas con cochinilla. Las incrustaciones teñidas sólo con cochinilla tienen un aspecto rojo-violáceo intenso in situ, ya que el color oscuro de la madera afecta significativamente al color de la incrustación. Los detalles se aplicaban a campos de color uniforme presionando pequeños trozos de resina tintada mucho más finos sobre la resina subyacente (figuras 16-17). En raras ocasiones se han encontrado capas muy finas de resina teñida con cochinilla adheridas a superficies de madera que rodean decoraciones incrustadas en queros [64]. Estas capas no parecen tener una finalidad decorativa directa, aunque habrían creado una superficie lisa algo brillante sobre la madera, tal vez un efecto estético deseado.

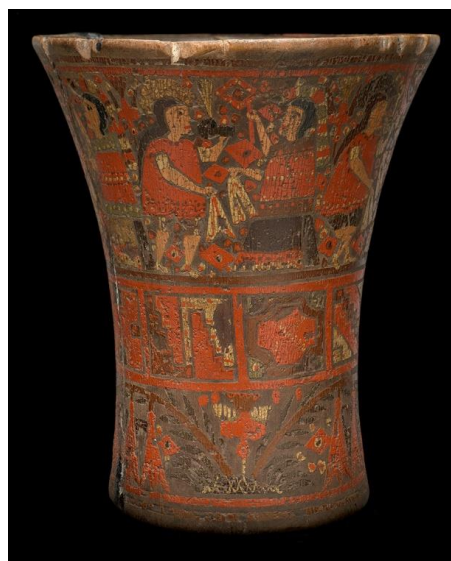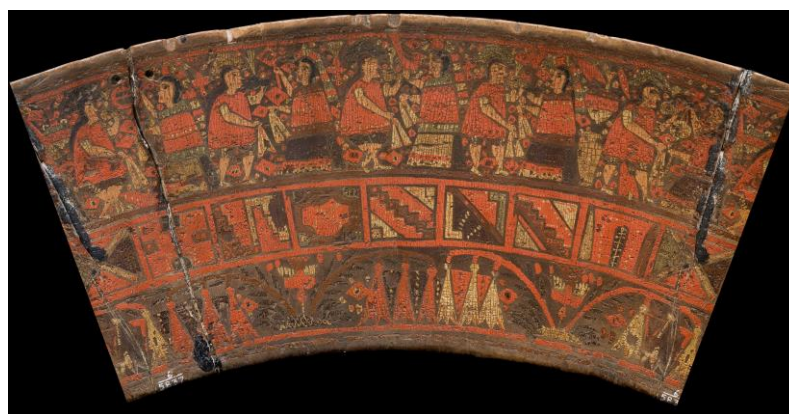

**Figura 16.** Quero. Altura 20 cm. Arriba: vista general. Abajo: despliegue que muestra el diseño completo. Museo Nacional Smithsonian de los Indios Americanos 6/5837. (Fotografías: Ernest Amoroso).

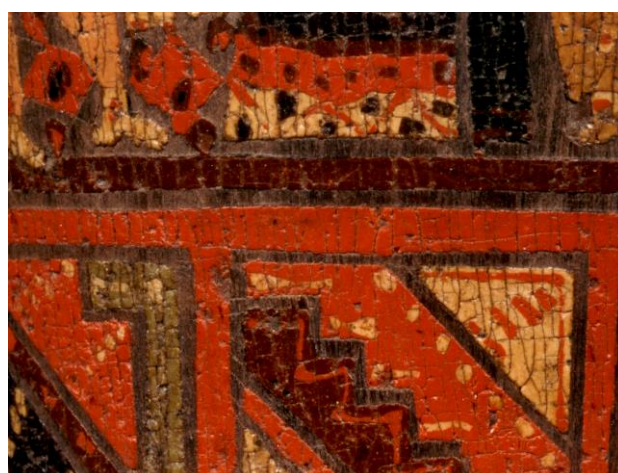

**Figura 17.** Detalle de la decoración del quero mostrado en la fig. 16. Anchura del campo: 6,2 cm. Anchura de las zonas expuestas de la superficie de madera: 1,5-3,0 mm. (Fotografía: Emily Kaplan.).

El procesado general, la preparación y la manipulación de la resina en Perú eran sin duda similares, a grandes rasgos, a los que se llevaban a cabo en Pasto, ya que habrían sido necesarios los mismos pasos para recoger, procesar inicialmente, mezclar con colores

y extender la resina en láminas relativamente finas. Pero las decoraciones aplicadas solían ser considerablemente más gruesas y opacas. No se conocen documentos contemporáneos que señalen, y mucho menos discutan, el uso de *Elaeagia* por los Incas, a pesar de que muchos queros ampliamente decorados con incrustaciones de *Elaeagia* fueron creados por los Incas durante el período colonial. Aunque la datación de los queros es fundamentalmente provisional, ya que pocos han sido excavados arqueológicamente, se cree que el uso de incrustaciones de *Elaeagia* en queros individuales se hizo más extenso con el paso del tiempo, y las superficies de los últimos objetos coloniales están a menudo casi totalmente cubiertas con decoraciones incrustadas. Esta decoración más extensa coincide con un cambio a un estilo narrativo que fue influenciado por ejemplos de arte español con los que los artesanos Incas se familiarizaron. La datación provisional de los queros descrita por Rowe [65] sigue siendo pertinente.

Además de en los huecos poco profundos de los queros, la resina de *Elaeagia* también se aplicaba directamente sobre superficies planas o talladas de objetos tridimensionales, siendo un ejemplo particularmente llamativo una tiana o asiento ceremonial de la colección del Museo Field [66]. Algunos queros también incluían tallas en altorrelieve sobre las que se aplicaba la resina.

Investigaciones recientes han mostrado varios cambios en los pigmentos utilizados por los Incas desde los primeros hasta los últimos periodos coloniales [67,68]. Hasta donde se sabe, sin embargo, basándose en un número limitado de análisis [69], no hubo cambios en la resina (material aglutinante) con la que se mezclaron a lo largo del periodo de aproximadamente 300 años en el que se hicieron los queros decorados, aunque un quero ha aparecido decorado con otro medio (no *Elaeagia*). Los primeros análisis llevaron a especular con la posibilidad de que se hubiera mezclado intencionadamente aceite vegetal con resina de *Elaeagia* durante la fabricación del material que se iba a utilizar como incrustación, pero ya no se cree que esto fuera así y, en cualquier caso, sería difícil de establecer, ya que la resina de *Elaeagia* en bruto contiene algo de aceite entre sus componentes.

### Un enigma: la relación entre los Incas y Colombia

A primera vista, parece posible que los Incas conocieran la resina de *Elaeagia* a través del contacto con nativos del sur de Colombia que estaban familiarizados con su recolección, preparación y aplicación a objetos de madera. Esto se basa en lo que se sabe sobre excursiones tardías de los Incas a Colombia y las primeras apariciones de resina de *Elaeagia* en queros.

Las excursiones Incas al suroeste de Colombia ocurrieron durante los últimos años del imperio [70]. Sus interacciones con los pueblos nativos de Colombia pueden haber sido bastante limitadas [71], y es posible que no hubieran oportunidad de conocer la resina de *Elaeagia*, que, como se discutió brevemente más arriba, durante esos años pudo haber sido utilizada sólo en el norte, más allá del área con la que los Incas estuvieron en contacto directo.

Si los Incas conocieron la inusual resina a través de ese contacto, una posibilidad es que la materia prima y los artesanos versados en su manipulación fueran llevados al sur, a los centros Incas en Perú, donde el material fue reutilizado para decorar queros. Aunque la datación de los primeros usos de la resina en queros no está firmemente establecida, algunas fechas recientes de radiocarbono resumidas anteriormente sugieren que la resina pudo haber sido utilizada antes de que tuvieran lugar las excursiones Incas a Colombia.

Newman et al. [29] concluyeron, basándose en un número muy limitado de análisis detallados, que la resina utilizada en las decoraciones de queros se parece mucho a los especímenes botánicos de *E. utilis*, un hallazgo que complica aún más las posibles conexiones directas entre el uso de la resina por parte de las dos culturas tan separadas. Esta conclusión se basó en dos tipos de técnicas cromatográficas, que ya se han señalado brevemente. La figura 18 muestra la proporción de dos componentes significativos en las

resinas de *Elaeagia* que distinguen entre las dos especies (a partir de análisis py GC/MS); también se representan las proporciones observadas en muestras de objetos de origen colombiano y de queros Incas.

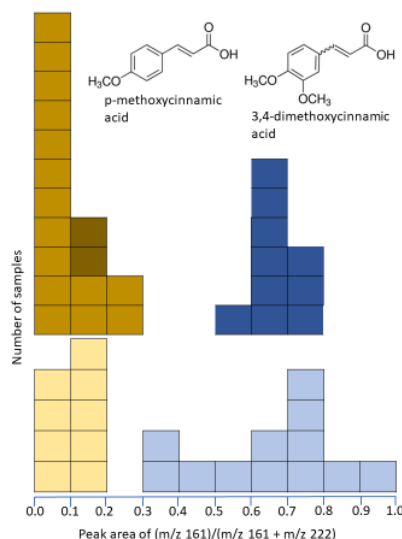

**Figura 18.** Gráfico de proporciones de intensidades de  $m/z$  161/( $m/z$  161 +  $m/z$  222) de pirogramas de muestras botánicas de *Elaeagia* y de muestras de artefactos que contienen *Elaeagia*.  $m/z$  161 es un fragmento principal del éster metílico del ácido p-metoxicinámico,  $m/z$  222 del éster metílico del ácido 3,4-dimetoxicinámico. Recuadros amarillo claro: especímenes botánicos de resina de *E. pastoensis*. Recuadros azul claro: muestras botánicas de resina de *E. utilis*. Recuadros mostaza oscuro: muestras de objetos de la época colonial fabricados en Pasto, Colombia. Recuadros marrones: muestras de cuentas de resina precoloniales de Colombia. Recuadros azul oscuro: muestras de queros Incas. (Fuente de los datos: Newman et al. [24]).

El botánico colombiano J. Rodrigo Botina (correspondencia no publicada, 2022) ha argumentado que la resina de *E. utilis* no puede ser manipulada con éxito de la misma manera que la resina de *E. pastoensis* y por lo tanto no pudo haber sido utilizada por los Incas. Una nota intrigante en Stuckart [19] sugiere que *E. utilis* es conocida por las personas que actualmente recolectan la resina usada en Pasto, pero que se reconoció que la resina de esta especie no podía ser usada para decorar objetos. Esta parece ser la única afirmación publicada que aborda diferencias potencialmente cruciales en el comportamiento de las dos resinas, asumiendo que la resina inadecuada provenía de *E. utilis*.

Un experimento reciente con fragmentos muy pequeños (2-3 mm) de resina de las dos especies ha sugerido que, en general, no es más difícil manipular *E. utilis* que *E. pastoensis*. El calentamiento repetido en agua hirviendo y la presión sobre la resina caliente con una herramienta plana de acero redujeron el trozo de *E. utilis* a una fina lámina de unos 0,5 mm de grosor, un ejercicio sencillo que resultó tan fácil de realizar como con un trozo de *E. pastoensis* de tamaño similar. Sin embargo, puede haber diferencias en la medida en que las dos especies se pueden estirar en capas finas, lo que en efecto habría sido un factor limitante en la forma en que la resina se podría utilizar en los objetos, pero esto aún está por determinar. Como se mencionó anteriormente, las incrustaciones en los queros tienden a ser más gruesas que las capas muy delgadas que aparecen en los objetos con "barniz brillante" del período colonial de Pasto, y por el momento no hay razón para cuestionar la hipótesis basada en los análisis de que *E. utilis* fue utilizada por los fabricantes de queros, quienes no necesitaban manipular la resina en capas tan delgadas como a veces necesitaban hacerlo los artesanos en Colombia.

Aunque los tipos de objetos, la forma en que se manipulaba la resina para crear diseños y las funciones de los objetos en los que se utilizaba eran bastante diferentes en la

época colonial de Colombia y Perú, hay un objeto intrigante, único hasta donde llegan los conocimientos de los autores. Se trata de una arqueta, fabricada en Bolivia, fechada en el siglo XVII (Museo Casa de Murillo, La Paz, Bolivia) [72]. Si bien ilustra un acontecimiento de la historia incaica, el objeto en sí es similar a los que se fabricaban en Pasto alrededor de la misma época, y la cobertura de toda la superficie exterior con decoraciones (aparentemente) a base de *Elaeagia* también es similar a la de los objetos de Pasto. Los materiales utilizados en la decoración de este objeto aún no han sido estudiados en detalle.

### Conclusiones

La(s) resina(s) de *Elaeagia* son materiales naturales poco comunes que, con algunas manipulaciones, pueden mezclarse con pigmentos o tintes, estirarse en finas láminas y aplicarse a superficies de diversos materiales, siendo la madera, al parecer, el más común históricamente. Aunque los artesanos de Pasto (Colombia) todavía la utilizan, hace tiempo que dejó de usarse en la única otra región de Sudamérica en la que parece que alguna vez se empleó como material decorativo. Los objetos decorados con resina de *Elaeagia* siguen siendo objeto de estudio, desde el punto de vista cultural, histórico-artístico, material y de conservación o preservación. Aunque la historia de la resina se conoce a grandes rasgos (y algunos más finos), aún quedan por investigar numerosos detalles sobre el material y la utilización, y las excavaciones arqueológicas que se realicen en el futuro podrían revelar más datos sobre su historia de uso. Las diferencias, físicas y químicas, entre la *Elaeagia* de varias especies merecen una mayor exploración. Hasta la fecha, de los limitados análisis existentes parece desprenderse que la especie utilizada en Colombia, quizá a lo largo de toda la historia en esa región, es *E. pastoensis*. En cambio, los Incas parecen haber utilizado una especie diferente, cuyas propiedades químicas se asemejan mucho a las de *E. utilis* (aunque hay otras especies de *Elaeagia* que aún no se han estudiado). Este hallazgo puede tener importantes implicaciones sobre cómo se desarrolló el uso de la mopa-mopa por parte de los Incas, un tema sobre el que se espera que futuras investigaciones arqueológicas también arrojen luz.

**Contribuciones de los autores:** Redacción - preparación del borrador original, visualización, conceptualización y análisis a menos que se indique lo contrario: R. N. Redacción - revisión y edición: E. K. y M. A. Todos los autores han leído y aceptado la versión publicada del manuscrito.

**Financiación:** Esta investigación no ha recibido financiación externa.

**Declaración de disponibilidad de datos:** Los conjuntos de datos analizados en este artículo pueden solicitarse al autor correspondiente.

**Agradecimientos:** Nuestro sincero agradecimiento a Lucía Pereira Pardo en la versión en español de este artículo. Los materiales botánicos de referencia proceden del Museo Nacional de Historia Natural, el Jardín Botánico de Missouri y el Museo Field de Chicago, y se agradece a los conservadores de dichas colecciones que permitieran tomar pequeñas muestras de resina para su análisis. Emily Kaplan recogió las muestras en el NMNH y Stephanie Hornbeck lo hizo en el Museo Field. Ellen Howe y Monica Katz proporcionaron muestras adicionales de *E. pastoensis*, y Jean Portell facilitó una muestra recogida por Mora-Osejo, quien describió por primera vez *E. pastoensis*. Muestras de objetos fueron tomadas por conservadores asociados o previamente asociados con la(s) colección(es) en particular, y Colleen Zori proporcionó muestras de un quero que ella excavó en Moqi. Michele Derrick realizó algunos de los análisis FTIR que se mencionan en este artículo. Federica Pozzi compartió archivos de datos de análisis de pirólisis GC/MS realizados en el Museo Metropolitano de Arte. Los autores también agradecen a los muchos escritores que han descrito documentos tempranos relacionados con la historia del uso de la mopa-mopa en Colombia, algunos de los cuales han sido indicados en el texto; sólo algunas partes muy selectivas de esta historia pudieron ser incluidas en este trabajo de revisión.

**Conflictos de intereses:** Los autores declaran no tener ningún conflicto de intereses.

Apéndice A



Veinticuatro muestras de referencia de *E. utilis* y *E. pastoensis* (tabla A1) procedentes de tres herbarios (Museo Field, Chicago, IL, EE.UU., FM; Jardín Botánico de Missouri, St. Louis, MO, EE.UU.; MO; Museo Nacional Smithsonian de Historia Natural, NMNH) han sido analizadas mediante microespectroscopía FTIR. Las muestras que podían tomarse de los herbarios iban desde trozos muy pequeños de resina finamente pulverizada hasta fragmentos más grandes (del tamaño de un milímetro). Las muestras de los herbarios no se recogieron necesariamente en los momentos óptimos para la producción de resina por parte de los árboles, ni se pretendía que las muestras incluyeran necesariamente una cantidad considerable de resina. Las muestras de herbario no han sido sometidas a ningún tipo de tratamiento, aunque es probable que algunas hayan sido tratadas con pesticidas. Muchas se recogieron hace décadas y todas están almacenadas sujetas a ramas que normalmente estaban pegadas con cinta adhesiva o a veces sujetas con adhesivo a papel (como en las figuras 3-4). Desde su recogida, la mayoría de los especímenes se han almacenado en la oscuridad y probablemente sólo han sido examinados ocasionalmente por los investigadores.

Se adquirieron dos espectros de una sola muestra pequeña de cada espécimen mediante análisis de transmisión en un espectrómetro FTIR Thermo iS10 con un microscopio IR Thermo Continuum acoplado. El área de análisis era de aproximadamente 50  $\mu\text{m}$  x 50  $\mu\text{m}$ . Se adquirieron 100 barridos con una resolución de 4  $\text{cm}^{-1}$  entre 4000-650  $\text{cm}^{-1}$ . Los espectros se adquirieron y procesaron con la versión 9 del software Thermo OMNIC. Tras la conversión a absorbancia, se aplicaron correcciones para eliminar las bandas de  $\text{CO}_2$  residuales del aire y se aplicó "Autobaseline". Además, cada espectro se suavizó para eliminar parte del ruido de fondo y se normalizó.

A continuación, los espectros de absorbancia procesados (uno de cada espécimen) se evaluaron mediante análisis de componentes principales (PCA) en el programa informático Solo versión 9.1.0.0 (Eigenvector Research Incorporated). Los 18 especímenes de *E. utilis* sirvieron de grupo modelo, y los seis especímenes de *E. pastoensis* se evaluaron a continuación con respecto a este grupo. Espectros completos (4000-650  $\text{cm}^{-1}$ ), espectros entre 1800-650  $\text{cm}^{-1}$ , absorbancias en 12 picos principales y espectros en el intervalo 1750-1690  $\text{cm}^{-1}$  se sometieron por separado al análisis PCA, obteniéndose la mejor separación de las dos especies en los espectros en el intervalo 1750-1690  $\text{cm}^{-1}$  (véase la figura 9).

**Table A1.** Muestras de herbarios. Especies: u, *Elaeagia utilis*; p, *Elaeagia pastoensis*.

| Colección | Especimen no. | Especie | Fecha de recogida | País de recogida |
|-----------|---------------|---------|-------------------|------------------|
| FM        | 1926966       | u       | 1967              | Perú             |
| FM        | 899023        | u       | 1936              | Colombia         |
| FM        | 2110369       | p       | 1988              | Colombia         |
| FM        | 1283354       | u       | 1946              | Colombia         |
| FM        | 2184875       | u       | 1997              | Perú             |
| FM        | 2046939       | u       | 1985              | Ecuador          |
| FM        | 2011061       | u       | 1963              | Perú             |
| FM        | 2260045       | u       | 2002              | Perú             |
| FM        | 2226159       | p       | 1999              | Perú             |
| FM        | 1753291       | u       | 1968              | Perú             |
| FM        | 1142196       | u       | 1943              | Ecuador          |
| FM        | 999470        | u       | 1939              | Colombia         |
| MO        | 3381352       | u       | 1967              | Perú             |
| MO        | 4228268       | u       | 1990              | Ecuador          |
| MO        | 3656206       | u       | 1987              | Ecuador          |
| MO        | 3012033       | p       | 1959              | Colombia         |
| MO        | 5834698       | p       | 1959              | Colombia         |
| MO        | 4571046       | p       | 1993              | Colombia         |
| NMNH      | 1770637       | u       | 1939              | Colombia         |
| NMNH      | 1901587       | u       | 1944              | Colombia         |



|      |         |   |      |          |
|------|---------|---|------|----------|
| NMNH | 2165540 | u | 1943 | Colombia |
| NMNH | 2166582 | u | 1944 | Colombia |
| NMNH | 2843435 | u | 1957 | Colombia |
| NMNH | 1661583 | p | 1935 | Colombia |

## Apéndice B

En este apéndice, se comparan los cromatogramas de los análisis py GC/MS de muestras de *E. pastoensis* realizados por dos laboratorios (Museo de Bellas Artes de Boston [MFA] y Museo Metropolitano de Arte [MMA]) que utilizan equipos analíticos diferentes. En ambos laboratorios, se añadió un 25% de TMAH en metanol a una muestra sólida antes de la pirólisis. El instrumento del MMA [33] utilizó un pirolizador Frontier Lab, mientras que los análisis del MFA [29] utilizaron un piroprobador CDS. La pirólisis en el MMA se llevó a cabo a 550°C, en el MFA a 480°C.

Las muestras del MFA son resina "cruda" del mercado de Pasto, Colombia (2010) y una muestra de herbario (ver tabla A1, NMNH 1661583; recolectada en 1935 en Mocoa, Departamento del Putumayo, Colombia). Las muestras del MMA son resina "cruda" recolectada en 2012 en Pasto y una muestra "procesada", preparada en el MMA hirviendo material "crudo" (recolectado en el mercado en 2002) en agua. Las cuatro muestras fueron probablemente recogidas de árboles que crecen en la misma región cerca de Mocoa en Colombia.

Los pirogramas contienen muchos de los mismos compuestos, aunque las cantidades relativas de éstos pueden ser muy variables. Las figuras A1-A2 muestran los pirogramas, con algunos picos comunes marcados. Los principales fragmentos m/z de estos picos figuran en la tabla A2. Algunos picos pudieron identificarse buscando en la biblioteca de espectros de masas Wiley Registry 10<sup>th</sup> edition/NIST 2012; otros no.

Las diferencias entre los pirogramas podrían reflejar en parte diferencias reales en la química de las muestras. La instrumentación podría provocar diferencias en los resultados. En particular, el programa de temperatura GC/MS para las muestras MMA terminó a una temperatura más alta que el programa MFA, y algunos de los compuestos de elución más tardía en las muestras MMA no se vieron en los pirogramas MFA. Estos compuestos de elución tardía incluyen derivados de flavonoides y triterpenoides. Estas clases de compuestos constituyen una pequeña proporción de la resina, pero los triterpenoides pueden ser característicos de *E. pastoensis*. Una serie de picos no identificados, probablemente fragmentos pirolíticos, en el centro de los pirogramas (picos 13-25) parecen ser característicos de la resina, aunque las proporciones aparentes no son las mismas y puede que no estén presentes todos los picos. Si son el resultado de la pirólisis de la matriz insoluble de la resina, estos picos podrían esperarse en muestras de resina procesadas (como la muestra "hervida" de MMA), así como en muestras "crudas", aunque todavía no se ha abordado en detalle cómo afecta el procesamiento a la química de la resina. La temperatura de pirólisis difirió entre los dos laboratorios, aunque esta variación probablemente no fue lo suficientemente grande como para dar lugar a diferencias significativas en los fragmentos de pirólisis que se generaron a partir de las muestras de resina.

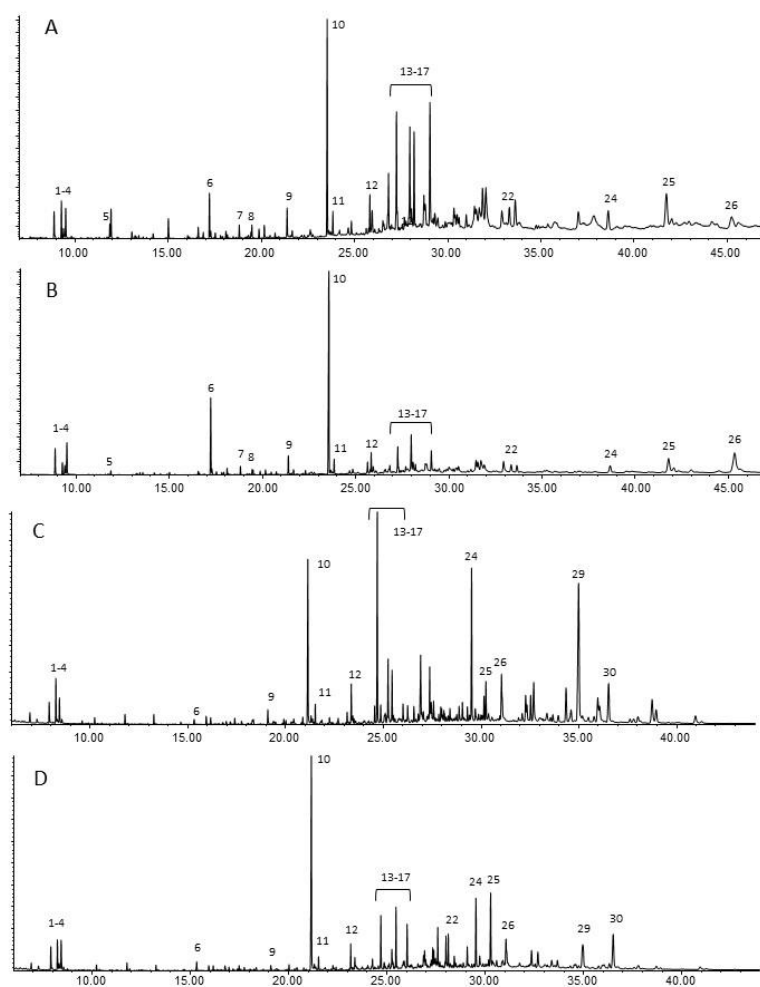

**Figura A1.** Pirogramas de análisis de muestras de *Elaeagia pastoensis*. A y B de análisis en el MFA, C y D de análisis en el Metropolitan Museum of Art. A: muestra de herbario, NMNH 1661583. B: resina cruda del mercado de Pasto. C: resina cruda del mercado de Pasto. D: resina "procesada" del mercado de Pasto. Las etiquetas se refieren a la información de la tabla A2.

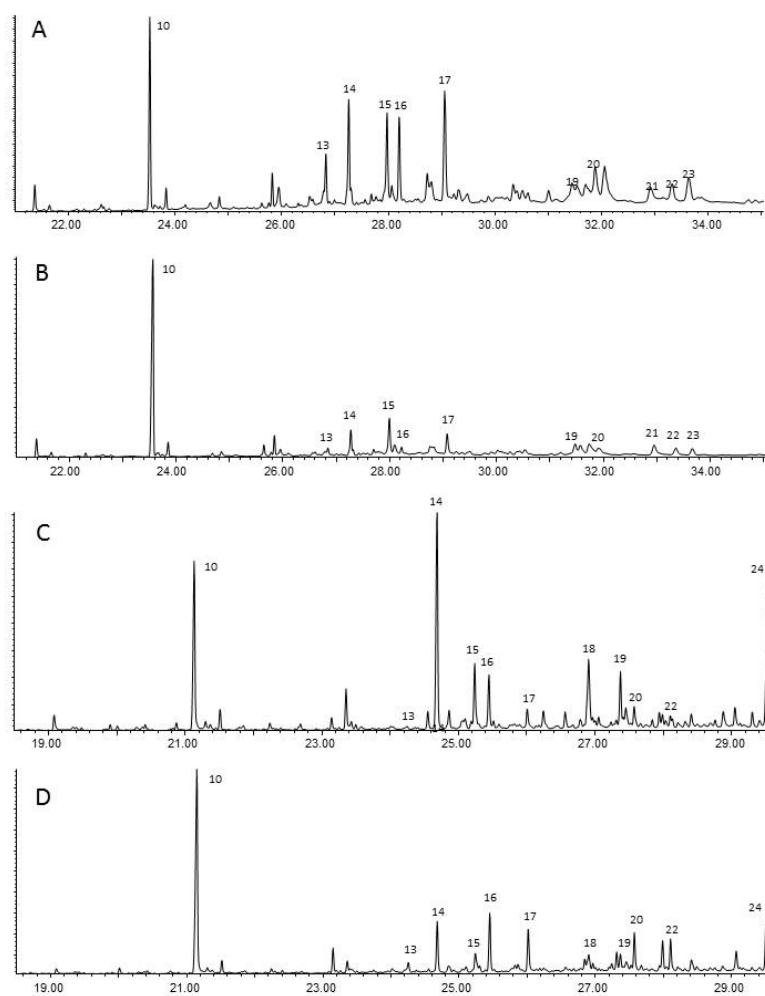

**Figura A2.** Detalles de los pirogramas mostrados en la figura A1. Las etiquetas hacen referencia a la información de la tabla A2.

**Table A2.** Picos seleccionados en pirogramas de *Elaeagia pastoensis*. Tiempos de retención (RT, minutos) para la muestra MFA NMNH 1661583 y la muestra MMA "resina cruda". Se indican las identificaciones de las bases de datos de espectros de masas cuando es posible.

| Peak no. | RT (MFA) | RT (MMA) | Mass spectra peaks, m/z (intensity)               | Identification                   |
|----------|----------|----------|---------------------------------------------------|----------------------------------|
| 1        | 8.86     | 7.9      | 45 (100), 43 (32), 75 (28)                        | 2-propanol, 1-3-dimethoxy        |
| 2        | 9.25     | 8.24     | 59 (100), 89 (85), 45 (57), 102 (43)              | propane, 1-2-3-trimethoxy        |
| 3        | 9.36     | 8.31     | 45 (100), 43 (48), 75 (43), 61 (25)               | 1,2-propanediol, 3-methoxy       |
| 4        | 9.48     | 8.42     | 45 (100), 58 (89), 75 (67), 43 (55)               | 2,3-dimethoxypropan-1-ol         |
| 5        | 11.85    |          | 122 (100), 91 (51), 77 (33), 79 (28)              | benzene, 1-methoxy-3-methyl      |
| 6        | 17.2     | 15.32    | 164 (100), 149 (37), 91 (35), 77 (31)             | benzene, 4-ethenyl-1,2-dimethoxy |
| 7        | 18.82    |          | 166 (100), 95 (30), 77 (23), 51 (15)              | benzaldehyde, 3,4-dimethoxy      |
| 8        | 19.49    |          | 152 (100), 55 (92), 74 (81), 83 (70)              | nonanedioic acid, methyl ester   |
| 9        | 21.38    | 19.1     | 161 (100), 192 (67), 133 (38), 89 (19)            | methyl p-methoxycinnamate, cis   |
| 10       | 23.53    | 21.13    | 222 (100), 191 (47), 207 (17), 147 (12)           | methyl 3,4-dimethoxycinnamate    |
| 11       | 23.84    | 21.51    | 74 (100), 87 (85), 270 (22), 143 (19)             | hexadecanoic acid, methyl ester  |
| 12       | 25.83    | 23.36    | 74 (100), 87 (63), 43 (28), 55 (24)               | octadecanoic acid, methyl ester  |
| 13       | 26.84    | 24.26    | 248 (100), 55 (96), 98 (78), 81 (72), 67 (69)     |                                  |
| 14       | 27.26    | 24.68    | 215 (100), 159 (82), 95 (58), 71 (54), 45 (27)    |                                  |
| 15       | 27.98    | 25.24    | 169 (100), 145 (73), 95 (62), 87 (44), 55 (44)    |                                  |
| 16       | 28.21    | 25.45    | 215 (100), 173 (67), 141 (58), 81 (48), 187 (44)  |                                  |
| 17       | 29.07    | 26.01    | 169 (100), 87 (99), 127 (93), 159 (71), 155 (53)  |                                  |
| 18       |          | 26.91    | 215 (100), 71 (81), 135 (59), 201 (52), 67 (49)   |                                  |
| 19       | 31.46    | 27.37    | 215 (100), 167 (57), 71 (45), 135 (41), 55 (32)   |                                  |
| 20       | 31.88    | 27.57    | 201 (100), 169 (32), 137 (32), 71 (25)            |                                  |
| 21       | 32.93    |          | 153 (100), 55 (66), 169 (65), 81 (63), 113 (59)   |                                  |
| 22       | 33.32    | 28.1     | 187 (100), 201 (87), 155 (81), 137 (44), 71 (36)  |                                  |
| 23       | 33.64    |          | 119 (100), 299 (87), 85 (87), 342 (85), 189 (75)  |                                  |
| 24       | 38.61    | 29.51    | 299 (100), 191 (72), 43 (67), 95 (67), 331 (62)   |                                  |
| 25       | 41.75    | 30.25    | 299 (100), 43 (84), 95 (74), 207 (72), 317 (70)   |                                  |
| 26       |          | 31.04    | 312 (100), 311 (50), 266 (25), 283 (25), 313 (20) | tri-o-methylapigenin             |
| 27       |          | 32.27    | 189 (100), 69 (98), 109 (93), 191 (73), 95 (68)   | (highest m/z 440)                |
| 28       |          | 32.69    | 342 (100), 341 (68), 296 (31), 313 (27), 343 (20) | methylated luteolin derivative?  |
| 29       |          | 34.97    | 109 (100), 69 (56), 189 (53), 95 (43), 191 (36)   | (highest m/z 440)                |
| 30       |          | 36.52    | 109 (100), 69 (60), 95 (46), 189 (38), 207 (35)   | lupeol? (highest m/z 426)        |

## Referencias

- Hernandez, J.; Perea, E.; Mejía, K.; Jacobo, C. "Effect of Figue Fibers in the Behavior of a New Biobased Composite from Renewable Mopa-Mopa Resin," *Polymers* 12 (2020): 1573.
- Weddell, H. A. *Histoire Naturelle des Quinquinas, ou monograph du genre Cinchona*. Paris: Victor Masson, 1849, p. 94.
- Goudot, M.J., "Notice sur une rubiacée du genre Condaminea, et sur le vernis qu'elle produit", *Compte Rendu des Séances de l'Académie des Sciences* 18 (enero-junio de 1844): 260-262.
- Mora-Osejo, L.E., "El barniz de Pasto", *Caldasia* 11 (1977): 5-31.
- Humboldt, A. von. "Sobre el barniz de Pasto", en *Alexander von Humboldt en Colombia: Extractos de sus Diarios preparados y presentados por la Academia Colombiana de Ciencias Exactas, Físicas y Naturales y la Academia de Ciencias de la República Democrática Alemana*, ed. Publicismo y Ediciones. Publicismo y Ediciones. Bogotá, Colombia, 1982; traducción al español de los originales alemán y francés. Diario VII, 188-189.
- Boussingault, M. *Viages Científicos a Los Andes Ecuatoriales ó Colección de Memorias sobre Física, Química é Historia Naturel de la Nueva Granada, Ecuador y Venezuela*, Paris: Liberia Castellana, 1849: "Sobre la composición del barniz de los indios de Pasto", pp. 116-120.

7. Global Biodiversity Information Facility (GBIF), [https://www.gbif.org/occurrence/search?taxon\\_key=2918905&advanced=1](https://www.gbif.org/occurrence/search?taxon_key=2918905&advanced=1) (consultado el 21 de noviembre de 2022).
8. Steyermark, J.A. "Rubiaceae". En Maguire, B. (ed.), *The Botany of the Guayana Highland, Part VI*. Memorias del Jardín Botánico de Nueva York 12 (1965): 1-285.
9. Maldonado, C. *Una revisión del género Elaeagia* (Rubiaceae). Tesis de Máster, Universidad de Aarhus, Dinamarca, 2005. 84 pp.
10. Mendoza-Cifuentes, H.; Aguilar-Cano, J. "Una nueva especie de barniz de pasto *Elaeagia* (Rubiaceae) de la cordillera Oriental de Colombia", *Biota Colombiana* 19 suppl. 1 (2018): 3-9.
11. Taylor, C. M. "Rubiacearum Americanarum Magna Hama Pars IV: New taxa and combinations in *Elaeagia* and Warzewiczia (Rondeletieae) from Mexico, Central America, and Colombia," *Novon* 11 (2001): 274-279.
12. Langenheim, J. *Resinas vegetales: Chemistry, Evolution, Ecology, Ethnobotany*. Portland, Oregon: Timber Press, Inc., 2003.
13. De Faria, D.; Edwards, H.; Afonso, M.; Brody, R.; Morais, J. "Raman spectroscopic analysis of a *tembetá*: a resin archaeological artefact in need of conservation," *Spectrochimica Acta Part A* 60 (2004): 1505-1513.
14. Lucero-Gómez, P.; Mathe, C.; Vieillescazes, C.; Bucio-Galindo, L.; Belio-Reyes, I.; Vega-Aviña, R. "Arqueobotánica: perfiles moleculares de HPLC para la discriminación de copales en Mesoamérica. Aplicación al estudio de materiales resinosos de objetos de ofrendas aztecas", *ArcheoSciences* 38 (2014). <http://journals.openedition.org/archeosciences/4204> ; DOI: <https://doi.org/10.4000/archeosciences.4204>
15. Piña-Torres, C.; Lucero-Gómez, P.; Nieto, S.; Vázquez, A.; Bucio, L.; Belio, I.; Vega, R.; Mathe, C.; Vieillescazes, C. "Una estrategia analítica basada en espectroscopia por transformada de Fourier, análisis de componentes principales y análisis discriminante lineal para sugerir el origen botánico de resinas de *Bursera*. Aplicación a muestras arqueológicas aztecas", *Revista de Patrimonio Cultural* 33 (2018): 48-59.
16. Kriss, D.; Howe, E.; Levinson, J.; Rizzo, A.; Carò, F.; DeLeonardis, L. "Un estudio material y técnico de la cerámica pintada de Paracas", *Antiquity* 92 (2018): 1492-1510.
17. De Faria, D.; Maier, M.; Parera, S.; Afonso, M.; Lima, S.; Edwards, H. "Non-invasive and non-destructive Raman spectroscopic characterization of some Brazilian ethnographic resins", *Journal of Raman Spectroscopy* 52 (2021): 2262-2271.
18. Harrison, A. "Recontextualizing Pre-Columbian Gold and Resin Artifacts from Panama in the Smithsonian Collections". En *Contextualizing Museum Collections at the Smithsonian Institution: The Relevance of Collections-Based Research in the Twenty-First Century*, eds. M. Martinez, E. Sears, L. Sieg, 155-64. Smithsonian Contributions to Anthropology 54. Washington, D.C.: Smithsonian Institution. Washington, D.C.: Smithsonian Institution Scholarly Press, 2022. <https://doi.org/10.5479/si.19436615>.
19. Stuckart, J. *Barniz de Pasto: The Impact of Tourism on a Traditional Craft*. Tesis doctoral, Universidad de Pittsburgh, 1982.
20. Juan, J.; de Ulloa, A. *Voyage to South America, Describing at Large, the Spanish Cities, Towns, Provinces, etc. on that extensive Continent*, traducido por J. Adams, 3<sup>rd</sup> edición, 1777, Capítulo III, pp. 345-346. Edición original española publicada en 1748. "En Pasto...hay ciertos árboles que producen una resina llamada mopa-mopa; y de ella se hace un barniz, que además de su exquisita belleza soporta el agua hirviendo, y aun los ácidos."
21. Jijón y Caamaño, J.; Larrea, C. 1918. *Un cementerio incásico en Quito y notas acerca de los Incas en el Ecuador*. Quito, Ecuador: Universidad Central, 1918: pp. 41-4.
22. Álvarez-White, M. *El barniz de Pasto. Secretos y revelaciones de la técnica*. Bogotá: Universidad de los Andes, 2023.
23. República de Colombia Superintendencia de Industria y Comercio, resolución no. 70002, 30 de noviembre de 2011. <https://www.sic.gov.co/sites/default/files/files/Denominacion%20de%20Origen/Resoluci%C3%B3n%2070002%20-%20Mopa%20Mopa%20Barniz%20de%20Pasto.pdf>  
<https://www.sic.gov.co/noticias/la-sic-en-el-corazon-de-las-denominaciones-de-origen>
24. Bentley, R. "The shikimate pathway-a metabolic tree with many branches," *Crit. Rev. Biochem. Mol. Biol.* 25 (1990): 307-384.
25. Herrmann, K.; Weaver, L. "The shikimate pathway," *Annual Review of Plant Physiology and Plant Molecular Biology*; 1999; 50, 473-503.

26. Mouradov, A.; Spangenberg, G. "Flavonoides: una red metabólica que media en la adaptación de las plantas a sus bienes inmuebles", *Frontiers in Plant Science* 5 (2014): 620.
27. Biftu, T.; Stevenson, R. "Flavone and triterpenoid constituents of *Elaeagia utilis*". *Journal of the Chemical Society, Perkin Transactions 1* (1978): 360-363.
28. Insuasty, B.; Argoti, J.; Altarejos, J.; Cuenca, G.; Chamorro, E. "Caracterización fisicoquímica a preliminar de la resina del mopa-mopa (*Elaeagia E. pastoensis* Mora), barniz de Pasto," *Scientia et Technica Año 13* (2007): 365-368.
29. Newman, R.; Derrick, M.; Kaplan, E. "Mopa mopa: Análisis científico e historia de una inusual resina sudamericana utilizada por los Incas y los artesanos de Pasto, Colombia", *Journal of the American Institute for Conservation* 54 (2015): 123-148.
30. Challinor, J. "The scope of pyrolysis methylation reactions," *Journal of Analytical and Applied Pyrolysis* 20 (1991): 15-24.
31. He, Y. et al., "The search for organic compounds with TMAH thermochemolysis: from earth analyses to exploration experiments," *Trends in Analytical Chemistry* 127 (2020): 115896.
32. White, H. "An Analysis of Unidentified Dark Materials Between Inlaid Motifs on Andean Wooden Queros," M.A. in Conservation of Archaeological and Ethnographic Materials, thesis, University of California at Los Angeles, 2016, <https://escholarship.org/content/qt6g06s31j/qt6g06s31j.pdf?t=ocvfw0>.
33. <sup>th</sup>Pozzi, F.; Basso, E.; Katz, M. "En busca de los colores de Humboldt: materiales y técnicas de una calabaza lacada del siglo XVII de Colombia", *Heritage Science* 8 (2020): 101.
34. Gómez, L.; Cubillos, J. *Exploraciones arqueológicas en el Alto de Lavapatas 1974-1975* (manuscrito inédito), pp. 47, 68.
35. Gómez, L.; Cubillos, J. *Arqueología de San Agustín: Alto de Lavapatas*, 1988, pp.7,8,95,183. Traducción de M.C. Álvarez-White.
36. Velandia, C. "La cultura arqueológica de San Agustín. Towards a new interpretation", en G. Politis y B. Alberti, eds., *Archaeology in Latin America* (Londres: Routledge, 1999), pp. 185-215.
37. Alarcón, M. , "Pastos y Protopastos: La red regional de intercambio de productos y materias primas de los siglos IX a XVI D.C . , " *Maguaré* 3 (1986), pp. 33,37.
38. Cadavid, G . , "Excavaciones arqueológicas en Tajumbina (La Cruz-Nariño) Segunda temporada", *Boletín de arqueología* 8 (1993), n° 1.
39. Analysis at Keck Carbon Cycle Accelerator Mass Spectrometry facility, U. California Irvine (informe inédito, 2017).
40. Fray Gerónimo de Escobar, 1582, citado en O. Granda Paz, *Aproximación al barniz de Pasto* (Barranquilla: Editorial Travesías, 2007), p. 15; traducción de Eleana Gómez.
41. Hamilton, J., *Through the Interior Provinces of Colombia* (Londres, John Murray, 1827), volumen 1, pp. 309-310. Castellvi, M. de, 1942. Citado en Stuckart, p.17.
42. Castellvi, M. "Reseña crítica sobre el descubrimiento de la región de Mocoa y fundaciones de ciudad del mismo nombre", *Boletín de Historia y Antigüedades*, 29 (1942), nos. 330-331, pp. 373-380; citado en Stuckart [19].
43. Katz, M., "Colonial Spanish American Lacquered Objects in the Collection at the Hispanic Society of America," in *Wooden Artifacts Group Postprints, Presentations from the 2016 AIC Annual Meeting in Montréal, Canada*, pp. 37-48. [https://www.culturalheritage.org/docs/default-source/publications/periodicals/wooden-artifacts-group/wooden-artifacts-group-postprints-vol-30-2016.pdf?sfvrsn=2c6b0a20\\_8](https://www.culturalheritage.org/docs/default-source/publications/periodicals/wooden-artifacts-group/wooden-artifacts-group-postprints-vol-30-2016.pdf?sfvrsn=2c6b0a20_8)
44. Sánchez Ledesma, A., "Análisis de los materiales de una arqueta decorada con barniz de Pasto, perteneciente a la colección del Museo de América de Madrid". *Anales del Museo de América* 28 (2020): 170-179.
45. Kawamura, Y., "El barniz de Pasto y las lacas de Japón: contexto histórico de sus encuentros", *Anales del Museo de América* 28 (2020): 99-108.
46. de la Mata, A., "El arte del barniz de Pasto en la colección del Museo de América de Madrid", *Anales del Museo de América* 28 (2020): 81-98.
47. Melchar, D., Burgio et al. "A collaborative, multidisciplinary and multi-analytical approach to the characterisation of barniz de Pasto objects from the V&A collections," *Transcending Boundaries: Integrated Approaches to Conservation* (Consejo Internacional de Museos, 2021).

48. Humphrey, N.; Burgio, L.; Melchar, D. "One small corner of the Viceroyalty in South Kensington: barniz de Pasto at the Victoria and Albert Museum, London", *Anales del Museo de América* 28 (2020): 147-156.
49. Fray Pedro Simón, *Noticias historiales de las conquistas de Tierra Firme en las Indias Occidentales* (publicado originalmente en 1627), citado en Stuckart [19].
50. Zarama Rincón, R., "Comercio y producción del barniz de Pasto en los siglos XVIII y XIX", *Academia Nariñense de Historia, Manual Historia de Pasto* 18 (2017): 53-81.
51. Botina, J. *Barniz o Mopa-Mopa* (Putumayo, Colombia: Corporación Autónoma Regional del Putumayo, 1990).
52. Artesanías de Colombia, *Cuaderno de oficio según técnica Mopa-Mopa o Barniz* (2004), 85 pp., INST-D%202016.%2029%20barniz%20de%20Pasto.pdf
53. Departamento de Cundinamarca (Bogotá), *Plan especial de salvaguardia conocimientos y técnicas tradicionales asociadas con el barniz de pasto mopa-mopa putumayo-nariño* (2019), 160 pp., PES%20BARNIZ%20MOPA%20MOPA.pdf
54. De Friedemann, N. "Mopa-mopa o barniz de Pasto", en *Lecciones Barrocas: Pinturas sobre la Vida de la Virgen de la Ermita de Egipto*, Banco de la República, Museo de Arte Religioso, Bogotá (1990), 40-53.
55. de la Mata, A. "El arte del barniz de Pasto en la colección del Museo de América de Madrid", *Anales del Museo de América* 28 (2020): 81-98.
56. Mora de Jaramillo, Y. "Barniz de Pasto, una artesanía colombiana de procedencia aborígen", *Revista Colombiana de Folclor* 3 (1963): 11-48.
57. Coddington, M. "The Decorative Arts in Latin America", en J. Newland et al. (eds.), *The Arts in Latin America 1492-1820* (New Haven, CT: Yale U. Press, 2006), pp. 98-113.
58. Álvarez, M. "La restauración", en *Lecciones Barrocas: Pinturas sobre la Vida de la Virgen de la Ermita de Egipto*, Banco de la República, Museo de Arte Religioso, Bogotá (1990), 20, 28.
59. Álvarez-White M., Fernández-Reguera, M. "Case #1: Mopa-Mopa Varnish as Decoration in Colombian Colonial Sculpture," in G. Siracusano and A. Rodríguez Romero, eds., *Materia Americana: the Body of Spanish American Images (16th to mid-19th centuries)* (Sáenz Peña: Universidad Nacional de Tres de Febrero, 2020), pp. 91-96.
60. Cummins, T. 2002. *Brindis con el Inca: Andean Abstraction and Colonial Images on Quero Vessels*. Ann Arbor, MI: University of Michigan Press, 2002.
61. Pearlstein, E.; Kaplan, E.; Howe, E.; Levinson, J. "Technical analyses of painted Inca and Colonial queros," in *Objects Specialty Group Postprints, Volume 6, 1999 (Proceedings of the Objects Specialty Group Session, June 11, 1999, 27<sup>th</sup> AIC Annual Meeting)*, pp. 94-103.
62. Zori, C. "Queros as Inalienable Objects: Ritual Drinking Vessels and the End of the Incas Empire at Moqi (Locumba Valley, Southern Peru)", *Latin American Antiquity* 33 (2022): 60-78.
63. Llanos, Luis. A. "Trabajos arqueológicos en el departamento del Cuzco bajo la dirección del Dr. Luis E. Valcárcel, Informe de Luis Llanos sobre Ollantaytambo," *Revista del Museo Nacional* 5(2) (1936): 123- 56. Lámina VII
64. Pearlstein, E.; Mackenzie, M.; Kaplan, E.; Howe, E.; Levinson, J. "Tradition and innovation: cochineal and Andean keros", en C. Padilla y B. Anderson, eds., *A red like no other: how cochineal colored the world: an epic story of art, culture, science, and trade* (Nueva York: Skia/Rizzoli, 2015), pp. 44-51.
65. Rowe, J. "The chronology of Inca wooden cups", en S. Lothrop et al., *Essays in Pre-Colombian Art and Archaeology* (Cambridge, MA: Harvard U. Press, 1961), pp. 317-341.
66. Falcón Huayta, V. "Tiana: Asiento Inca", *Revista Haucaypata. Investigaciones Arqueológicas Del Tahuantinsuyo* 4 (2012): 30-46.
67. Howe, E.; Kaplan, E.; Newman, R.; Frantz, J.; Pearlstein, E.; Levinson, J.; Maddon, O. "The occurrence of a titanium dioxide/silica white pigment on wooden Andean queros: a cultural and chronological marker", *Heritage Science* 6 (2018): 41
68. Curley, A.; Thibodeau, A.; Kaplan, E.; Howe, E.; Pearlstein, E.; Levinson, J. "Isotopic composition of lead white pigments on queros: implications for the chronology and production of Andean ritual drinking vessels during the colonial era", *Heritage Science* 8 (2020): 72.
69. Newman, R.; Derrick, M. "Painted Quero Cups from the Incas and Colonial Periods in Peru: An Analytical Study of Pigments and Media," in P. Vandiver et al. (eds.), *Materials Issues in Art and Archaeology VI (Symposium held November 26-30, 2001, Boston Massachusetts, USA)* (Warrendale, PA: Materials Research Society, 2202), pp. 291-302.



- 
70. D'Altroy, T. *Los Incas. Los pueblos de América*. (Malden, MA: Blackwell, 2002).
  71. Salomon, F. "A North Andean Status Trader Complex under Incas Rule", *Etnohistoria* 34 (1987): 63-77.
  72. Gisbert de Mesa, T. en J. Newland et al., eds., *The Arts in Latin America 1492-1820* (Filadelfia, PA: Museo de Arte de Filadelfia, 2006), entrada de catálogo 129.
